# Supplementary material
Source: MDPI journal article supplement (https://www.mdpi.com/2072-4292/16/10/1744)
Supplement: s1 [file s1 › remotesensing-2939905-supplementary.pdf]

Table S1: Formulas for retrieving LSP using remote sensing data (with  $NDVI_{SDC}$  as a specific example)

| Phenological parameters | Formulas                                                                            |
|-------------------------|-------------------------------------------------------------------------------------|
| $NDVI_{SOS}$            | $NDVI_{SOS} = NDVI_{min,up} + 0.2 \times (NDVI_{max} - NDVI_{min,up})$              |
| $NDVI_{MidGreenup}$     | $NDVI_{MidGreenup} = NDVI_{min,up} + 0.5 \times (NDVI_{max} - NDVI_{min,up})$       |
| $NDVI_{Maturity}$       | $NDVI_{Maturity} = NDVI_{min,up} + 0.9 \times (NDVI_{max} - NDVI_{min,up})$         |
| $NDVI_{Senescence}$     | $NDVI_{Senescence} = NDVI_{min,down} + 0.9 \times (NDVI_{max} - NDVI_{min,down})$   |
| $NDVI_{MidGreendown}$   | $NDVI_{MidGreendown} = NDVI_{min,down} + 0.5 \times (NDVI_{max} - NDVI_{min,down})$ |
| $NDVI_{EOS}$            | $NDVI_{EOS} = NDVI_{min,down} + 0.2 \times (NDVI_{max} - NDVI_{min,down})$          |

\*Note:  $NDVI_{min,up}$  represents the minimum value of NDVI during the ascending phase in a year,  $NDVI_{min,down}$  represents the minimum value of NDVI during the descending phase in a year, and  $NDVI_{max}$  represents the maximum value of NDVI in a year.

Table S2: The regression measurement statistics for the comparison between remote sensing phenology and actual phenology sites

| Data  | Vegetation type | Phenological parameter | $NDVI_{SDC}$ |         |         | $EVI2_{SDC}$ |         |         |
|-------|-----------------|------------------------|--------------|---------|---------|--------------|---------|---------|
|       |                 |                        | $R^2$        | RMSE(d) | Bias(d) | $R^2$        | RMSE(d) | Bias(d) |
| PEP27 | DBF             | SOS                    | 0.64         | 16.05   | -13.38  | 0.68         | 9.36    | -6.48   |
|       |                 | MidGreendown           | 0.62         | 12.39   | 10.34   | 0.65         | 6.81    | 3.47    |
|       | ENF             | SOS                    | 0.69         | 11.57   | -10.36  | 0.73         | 10.17   | -8.57   |
| USA-  | DTF             | SOS                    | 0.59         | 14.23   | -10.16  | 0.65         | 10.80   | -6.33   |
| NPN   |                 | MidGreendown           | 0.55         | 8.83    | -0.9    | 0.61         | 11.45   | -1.38   |

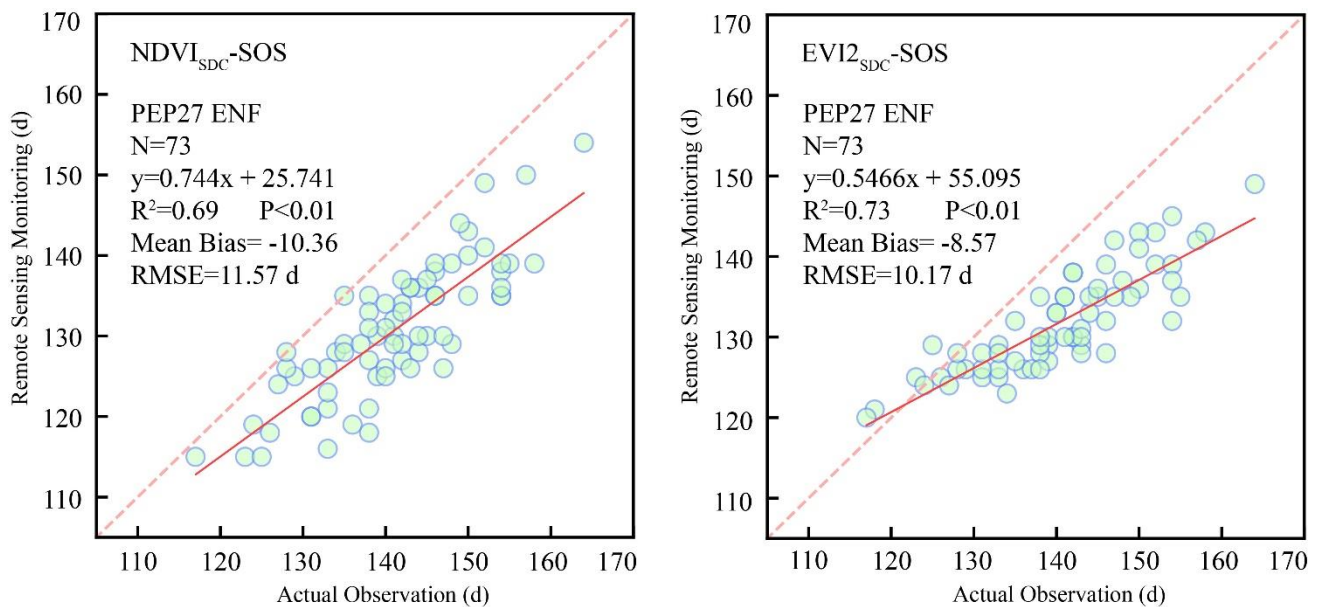

**Figure S1:** Comparison of phenological accuracy between remotely sensed retrievals and phenological observations derived from the PEP27 dataset for evergreen forests. The remotely sensed phenological results for the current year show temporal consistency with the observed phenological stations. ENF is an abbreviation for Evergreen Needleleaf Forest.

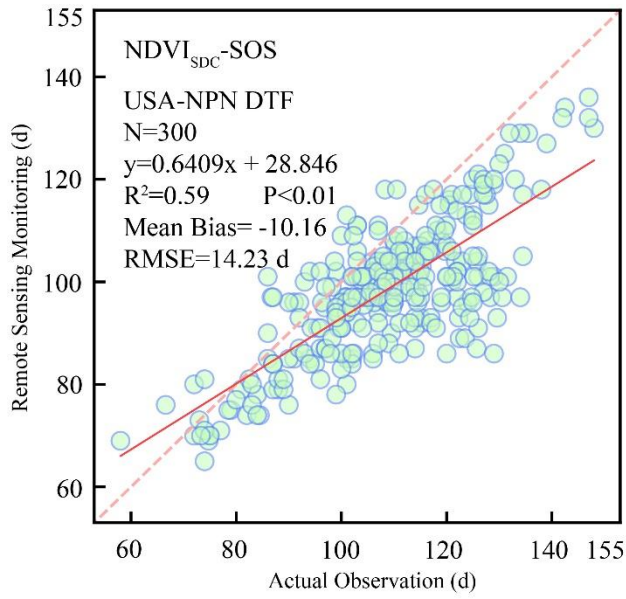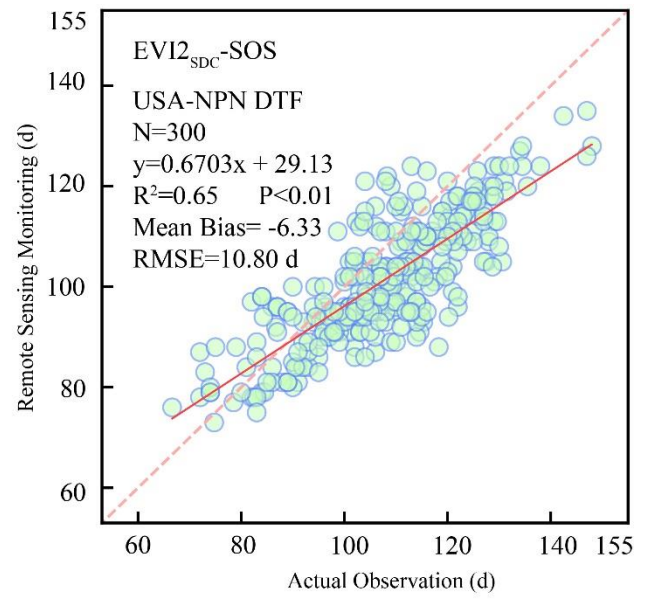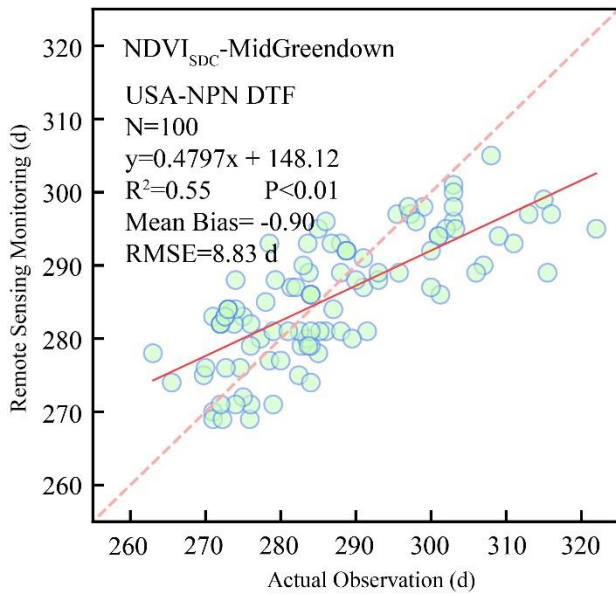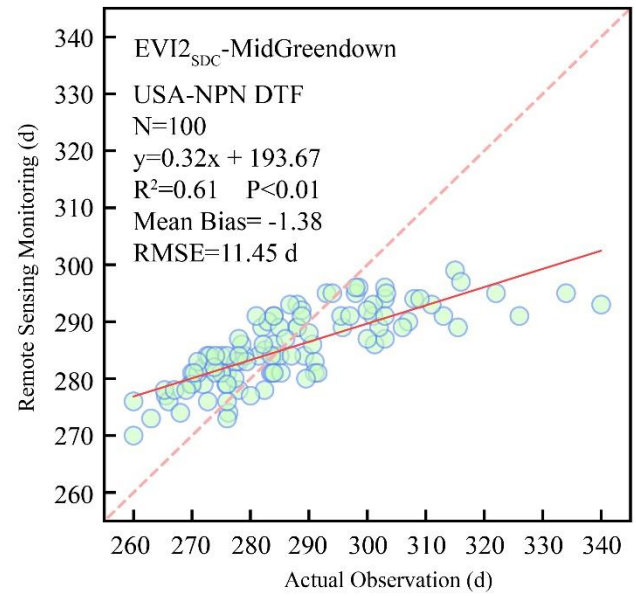

**Figure S2:** Comparison of phenological accuracy between remotely sensed retrievals and phenological observations derived from the USA National Phenology Network (USA-NPN) for deciduous forests. The remotely sensed phenological results for the current year demonstrate temporal consistency with the observed phenological stations. DTF represents deciduous type forest.

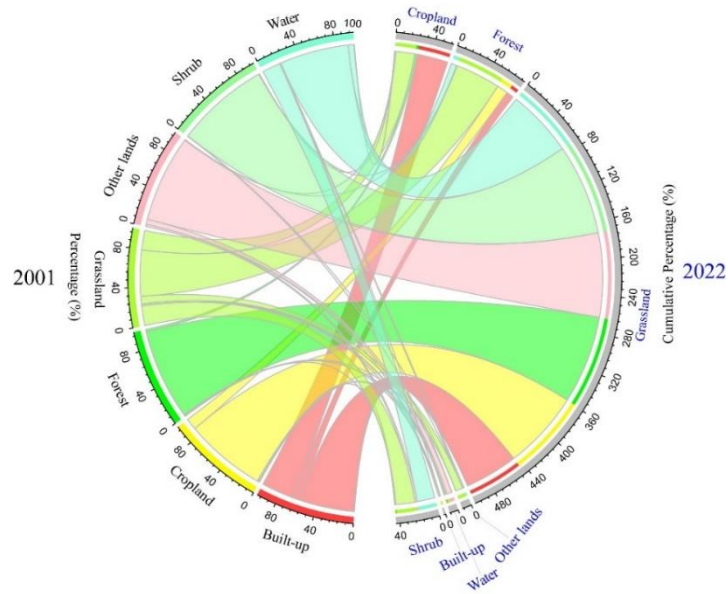

**Figure S3:** Flowchart of the percentage of land transfer area in the study area from 2001 to 2022.

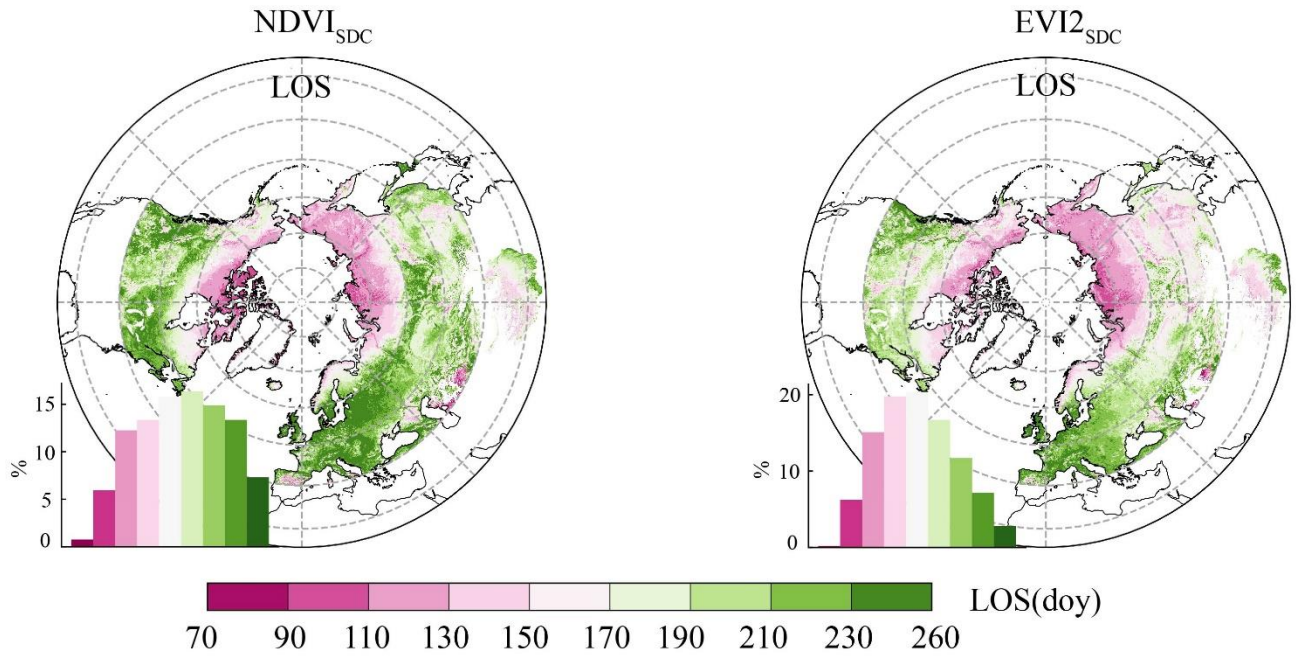

**Figure S4:** Spatial distribution of the long-term average of LOS derived from  $NDVI_{SDC}$  and  $EVI2_{SDC}$  in the study area from 2001 to 2022. Each histogram in the bottom left corner represents the frequency distribution of the corresponding phenological date.

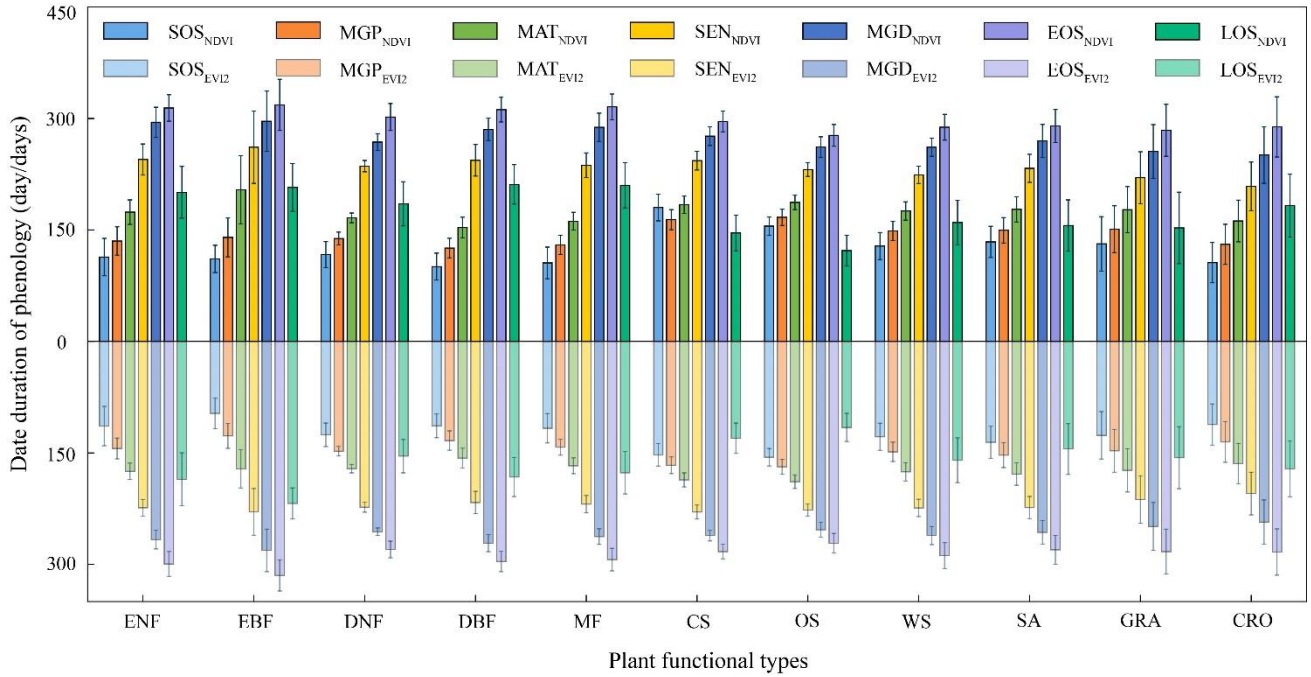

**Figure S5:** Vegetation phenology across different vegetation functional types. From left to right, the order of phenological parameters is SOS, MidGreenup (MGP), Maturity (MAT), Senescence (SEN), MidGreendown (MGD), EOS, and LOS. ENF: Evergreen Needleleaf Forest; EBF: Evergreen Broadleaf Forests; DNF: Deciduous Needleleaf Forests; DBF: Deciduous Broadleaf Forests; MF: Mixed Forests; CS: Closed Shrublands; OS: Open Shrublands; WS: Woody Savannas; SA: Savannas; GRA: Grasslands; CRO: Croplands. The NDVI and EVI2 for each phenological parameter refer to NDVI<sub>SDC</sub> and EVI2<sub>SDC</sub> datasets, respectively.

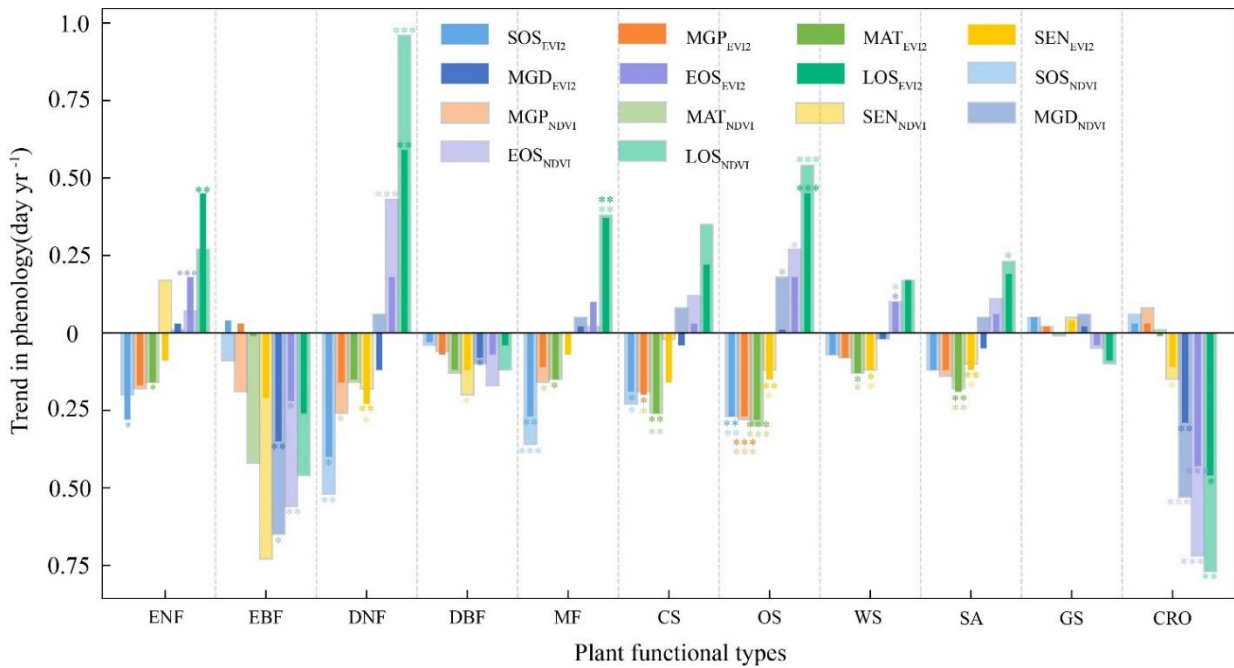

**Figure S6:** Vegetation phenological trends across different vegetation functional types. The order of phenological parameters from left to right and the definitions of the abbreviations on the x-axis are the same as in Figure S5. The significance levels are represented by symbols (\*), where \*, \*\*, and \*\*\* correspond to significance at the 95% level ( $P < 0.05$ ), 99% level ( $P < 0.01$ ), and 99.9% level ( $P < 0.001$ ), respectively.

Table S3: Pixel statistics and the percentage of significant pixels for each phenological parameter trend from 2001 to 2022

| Data sources        | Phenological parameters | Positive trend | Negative trend | Significant positive ratio(P<0.05) | Significant negative ratio(P<0.05) |
|---------------------|-------------------------|----------------|----------------|------------------------------------|------------------------------------|
| NDVI <sub>SDC</sub> | SOS                     | 39.80          | 60.20          | 5.91                               | 15.93                              |
|                     | MidGreenup              | 31.25          | 68.75          | 8.99                               | 16.96                              |
|                     | Maturity                | 27.15          | 72.85          | 7.37                               | 17.58                              |
|                     | Senescence              | 41.27          | 58.73          | 6.87                               | 10.29                              |
|                     | MidGreendown            | 58.47          | 41.53          | 10.49                              | 10.77                              |
|                     | EOS                     | 61.72          | 38.28          | 11.29                              | 11.60                              |
|                     | LOS                     | 65.01          | 34.99          | 18.06                              | 13.29                              |
|                     | SOS                     | 30.33          | 69.67          | 9.47                               | 15.92                              |
| EVI2 <sub>SDC</sub> | MidGreenup              | 27.76          | 72.24          | 9.47                               | 15.97                              |
|                     | Maturity                | 23.50          | 76.50          | 7.55                               | 18.23                              |
|                     | Senescence              | 32.34          | 67.66          | 6.08                               | 12.48                              |
|                     | MidGreendown            | 52.89          | 47.11          | 8.78                               | 12.35                              |
|                     | EOS                     | 59.36          | 40.64          | 10.76                              | 11.28                              |
|                     | LOS                     | 65.20          | 34.80          | 17.33                              | 13.17                              |

\*Note: "Positive Trend" represents the proportion of positive pixels out of the total pixels. "Negative Trend" represents the proportion of negative pixels out of the total pixels. "Significant Positive Ratio (P<0.05)" represents the proportion of significant positive pixels out of the total positive pixels. "Significant Negative Ratio (P<0.05)" represents the proportion of significant negative pixels out of the total negative pixels.

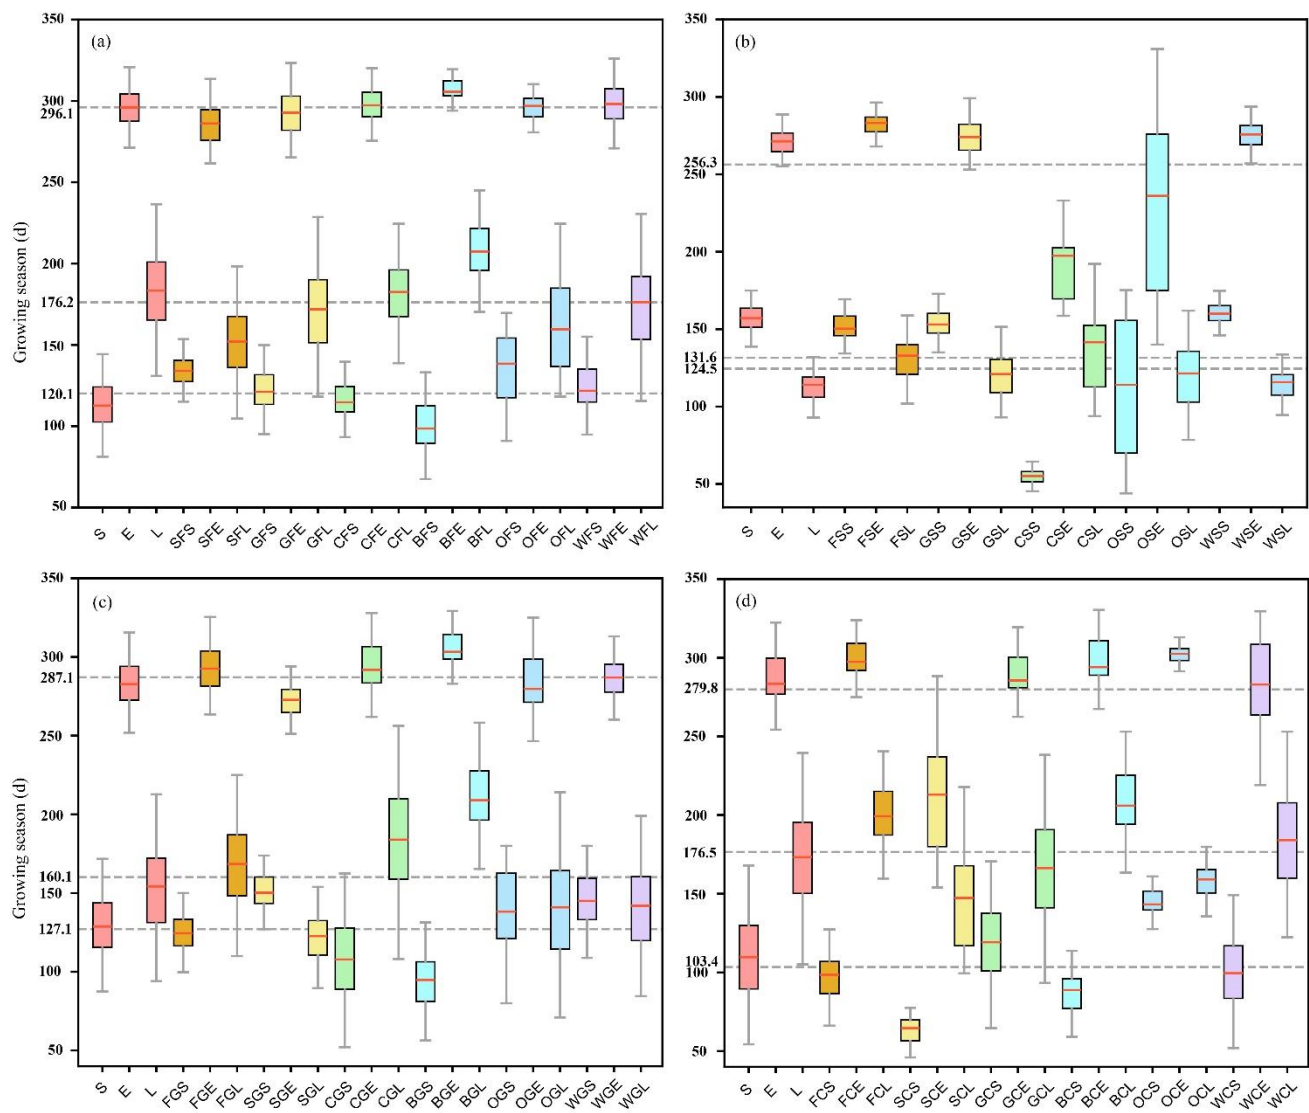

**Figure S7:** Land use change patterns in forest(a), shrub(b), grassland(c), and cropland(d) based on the phenological differences of LSP (SOS, EOS, LOS) retrieved from EVI2<sub>SDC</sub>. Panels (a), (b), (c), and (d) represent the land use change patterns in forest, shrub, grassland, and cropland, respectively. The x-axis naming convention in each panel follows the same convention as Figure 6(a,b,c,d). In each panel, the three gray dashed lines from top to bottom indicate the average values of EOS, LOS, and SOS under each land use change pattern.

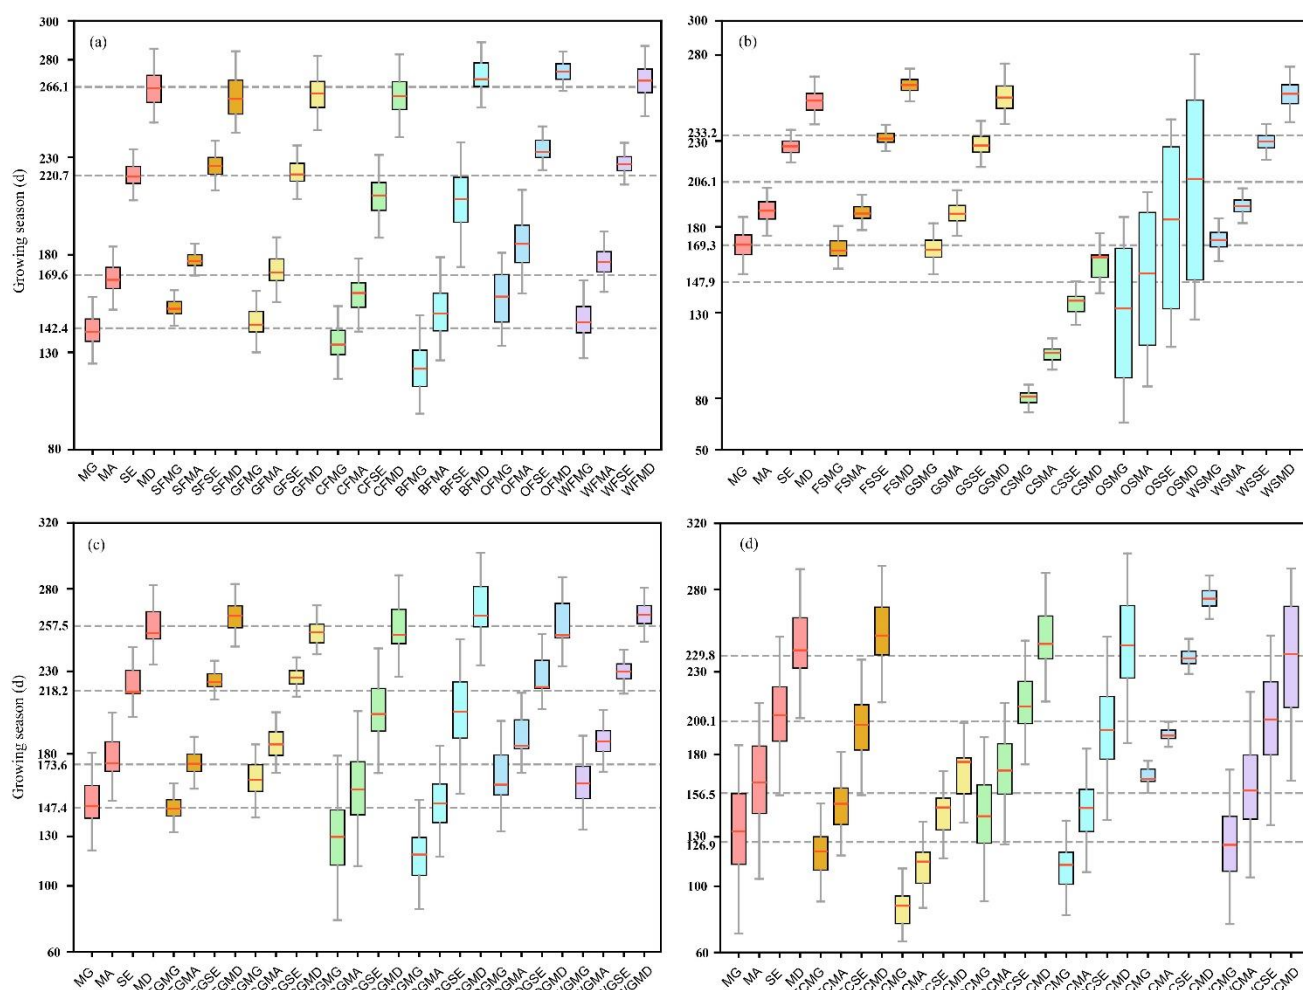

**Figure S8:** Land use change patterns in forest(a), shrub(b), grassland(c), and cropland(d) based on the phenological differences of LSP (MidGreenup, Maturity, Senescence, and MidGreendown) retrieved from EVI2<sub>SDC</sub>. Panels (a), (b), (c), and (d) represent the land use change patterns in forest, shrub, grassland, and cropland, respectively. The x-axis naming convention in each panel follows the same convention as Figure 6(e,f,g,h). In each panel, the four gray dashed lines from top to bottom indicate the average values of MidGreendown, Senescence, Maturity, and MidGreenup under each land use change pattern.

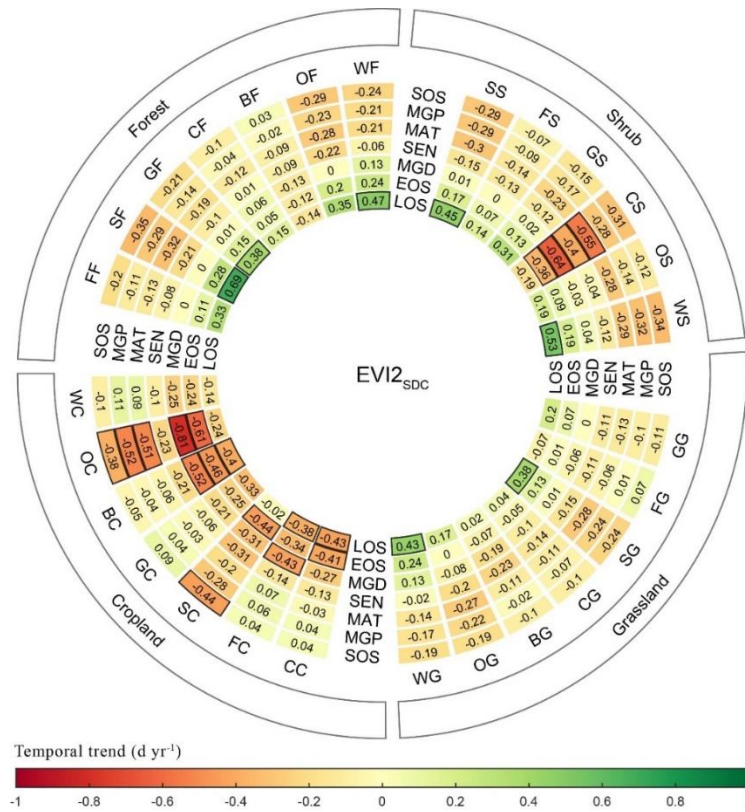

**Figure S9:** Land use change patterns in forest, shrub, grassland, and cropland based on the phenological trend retrieved from EVI2<sub>SDC</sub>. The abbreviations used in each column and row of the figure are consistent with Figure 7.

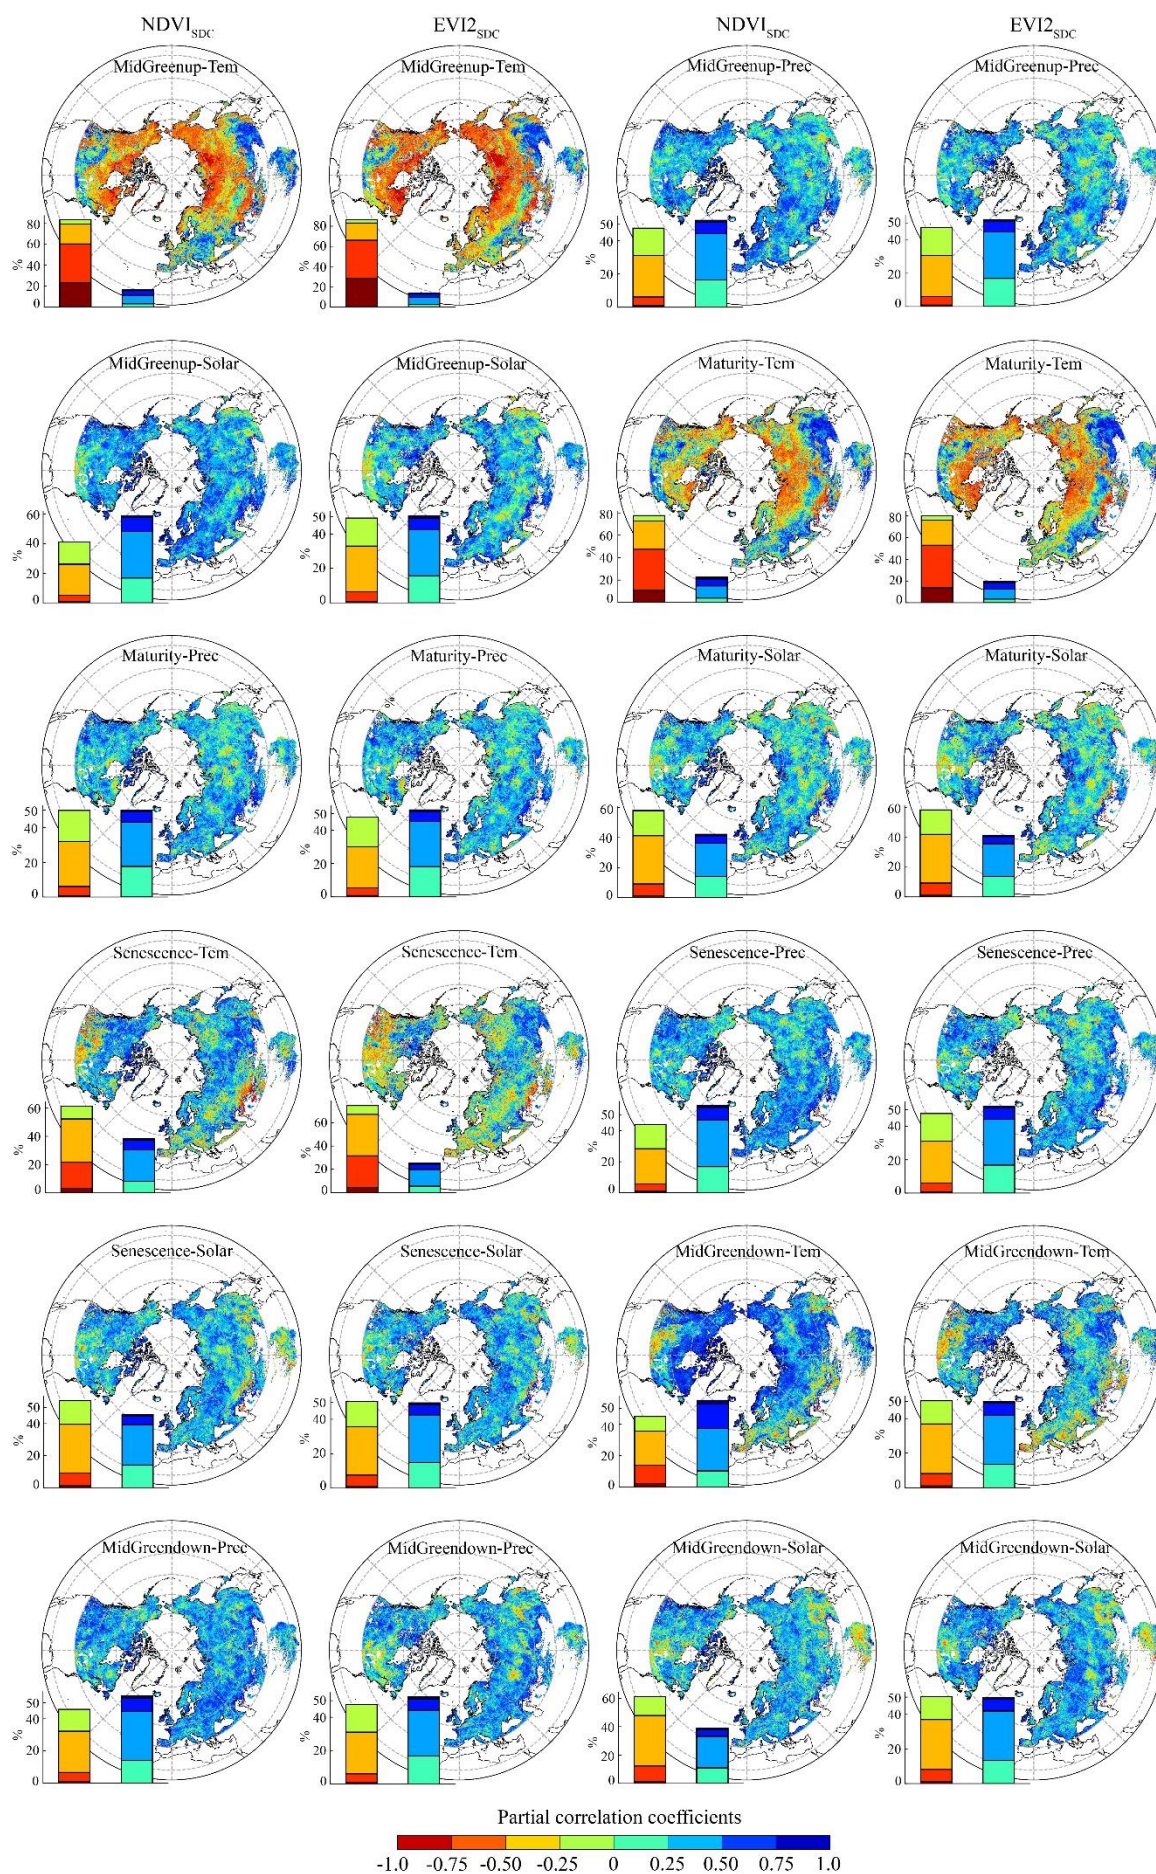

**Figure S10:** Spatial distribution of partial correlation coefficients between climate variables (temperature, precipitation, and solar radiation) and phenological parameters (Midgreenup, Maturity, Senescence, and MidGreendown). The histograms in the lower left corner of each picture represent the frequency distribution of corresponding partial correlations.

Table S4: Percentage contribution of major climatic factors driving for phenological parameters

|              | NDVI <sub>SDC</sub> |         |          | EVI2 <sub>SDC</sub> |         |          |
|--------------|---------------------|---------|----------|---------------------|---------|----------|
|              | Tem(%)              | Prec(%) | Solar(%) | Tem(%)              | Prec(%) | Solar(%) |
| SOS          | 79.20               | 10.66   | 10.14    | 83.39               | 8.63    | 7.99     |
| MidGreenup   | 81.40               | 9.18    | 9.41     | 85.19               | 6.96    | 7.85     |
| Maturity     | 74.95               | 11.39   | 13.66    | 78.33               | 9.60    | 12.07    |
| Senescence   | 51.00               | 23.88   | 25.12    | 59.03               | 20.04   | 20.93    |
| MidGreendown | 48.07               | 24.79   | 27.14    | 44.16               | 26.92   | 28.92    |
| EOS          | 56.42               | 20.94   | 22.64    | 44.15               | 27.51   | 28.34    |

\*Note: Tem refers to temperature, Prec refers to precipitation, and Solar refers to solar radiation.

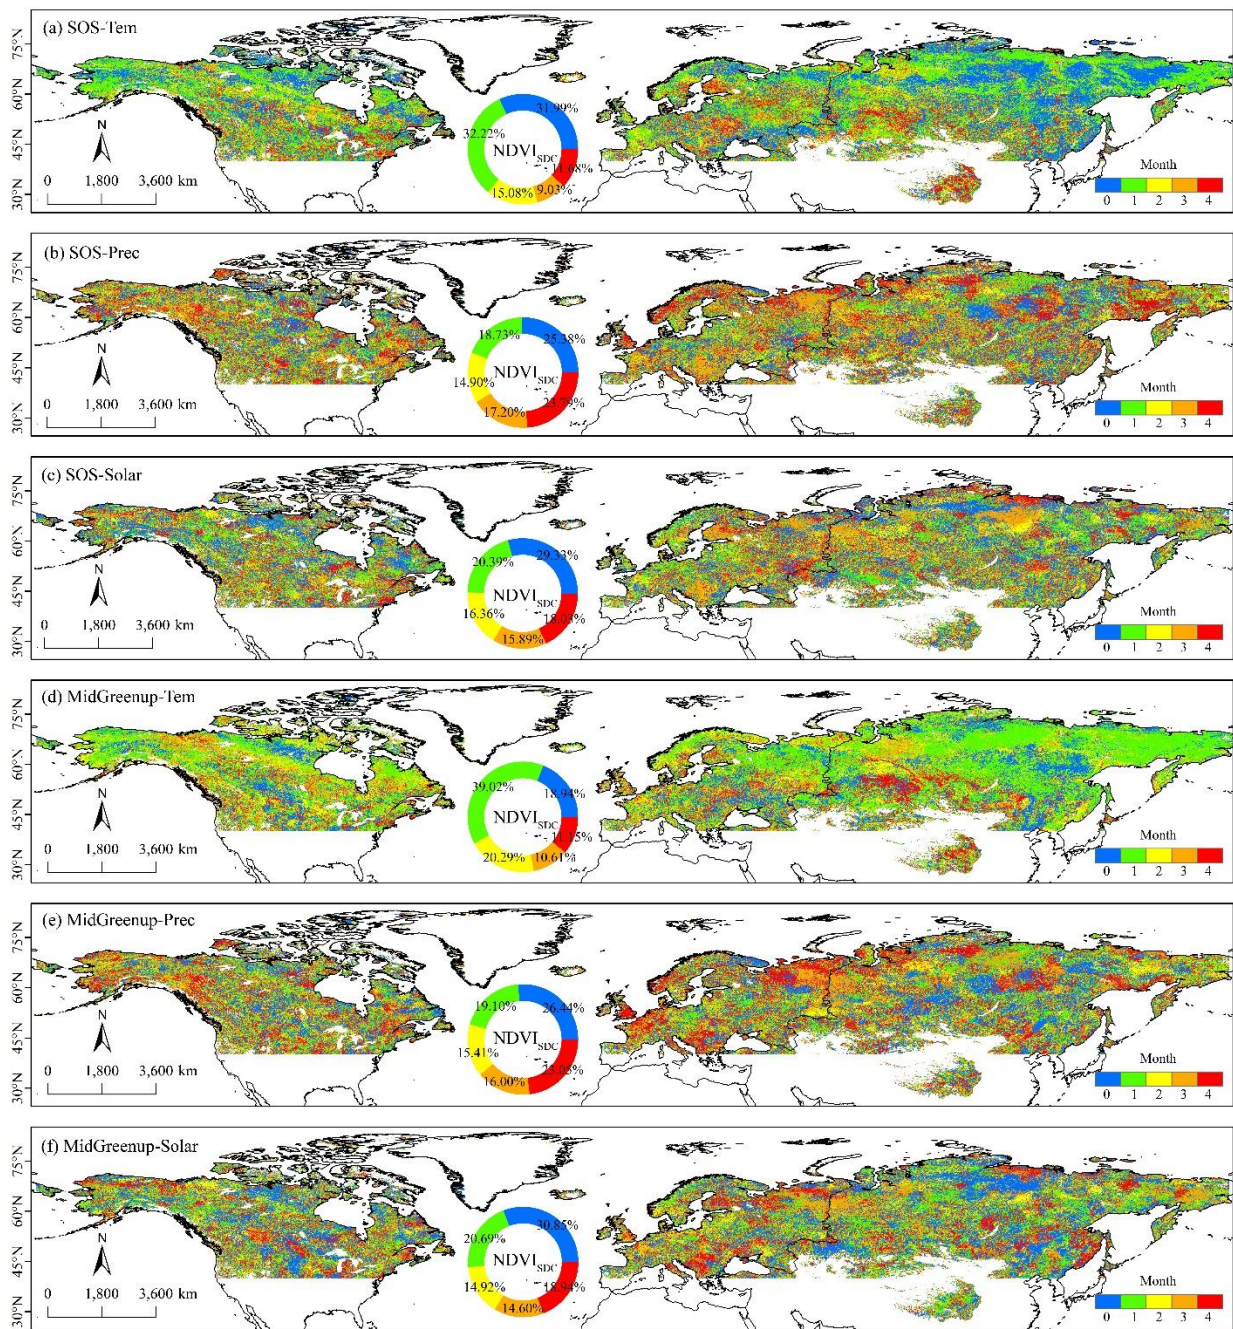

**Figure S11:** The spatial distribution of pre-season length for SOS and MidGreenup based on the NDVI<sub>SDC</sub> dataset. The pre-season length is defined as the period with the highest partial correlation coefficient between phenological parameters and climate variables (temperature (Tem), precipitation (Prec) and solar radiation (Solar) for the months preceding the phenological parameters-corresponding month.

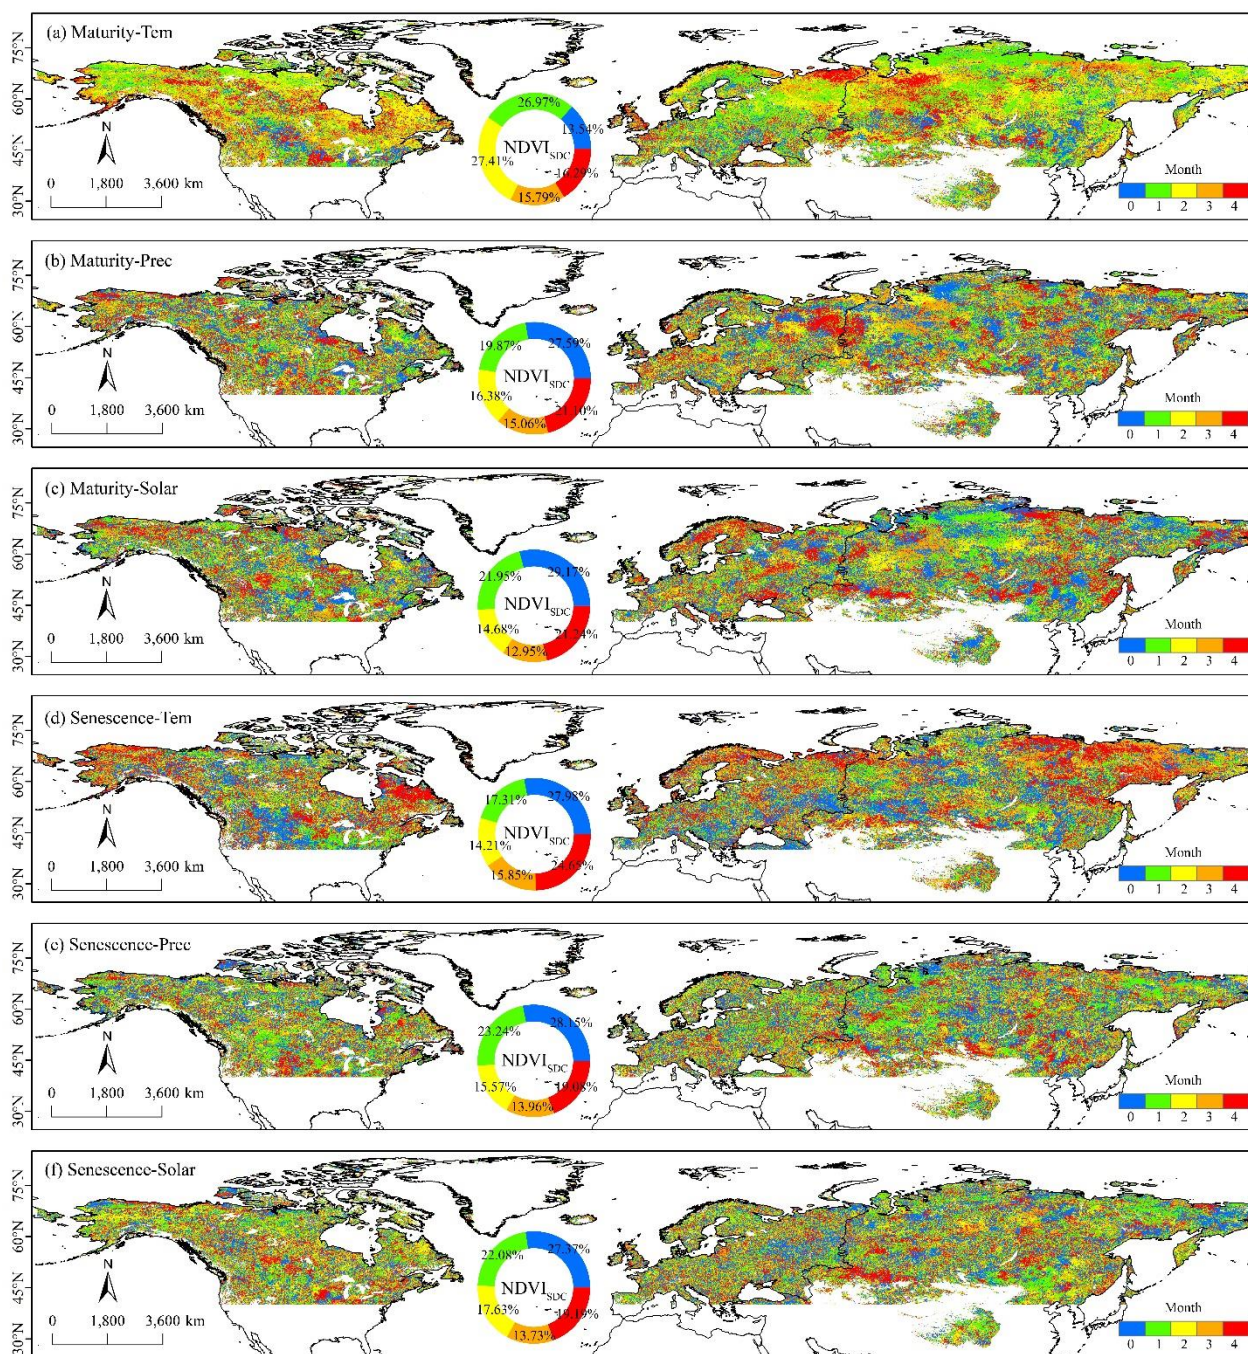

**Figure S12:** The spatial distribution of preseason length for Maturity and Senescence based on the NDVI<sub>sdc</sub> dataset.

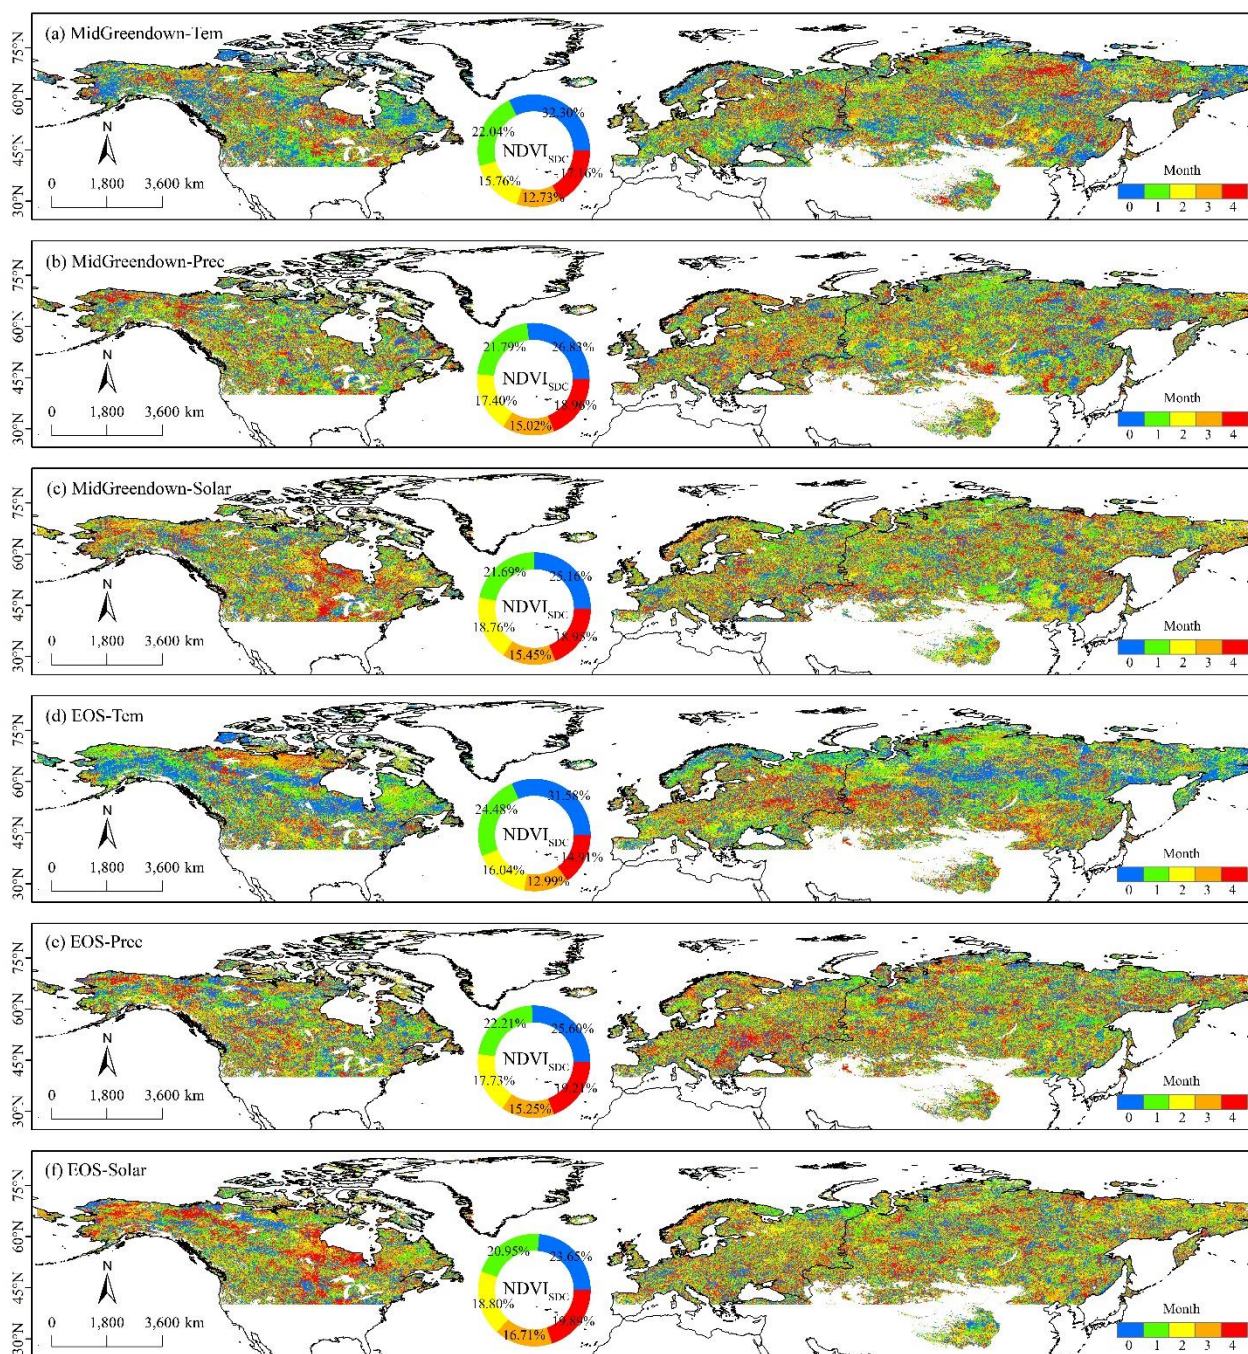

**Figure S13:** The spatial distribution of preseason length for MidGreenupdown and EOS based on the NDVI<sub>SDC</sub> dataset.

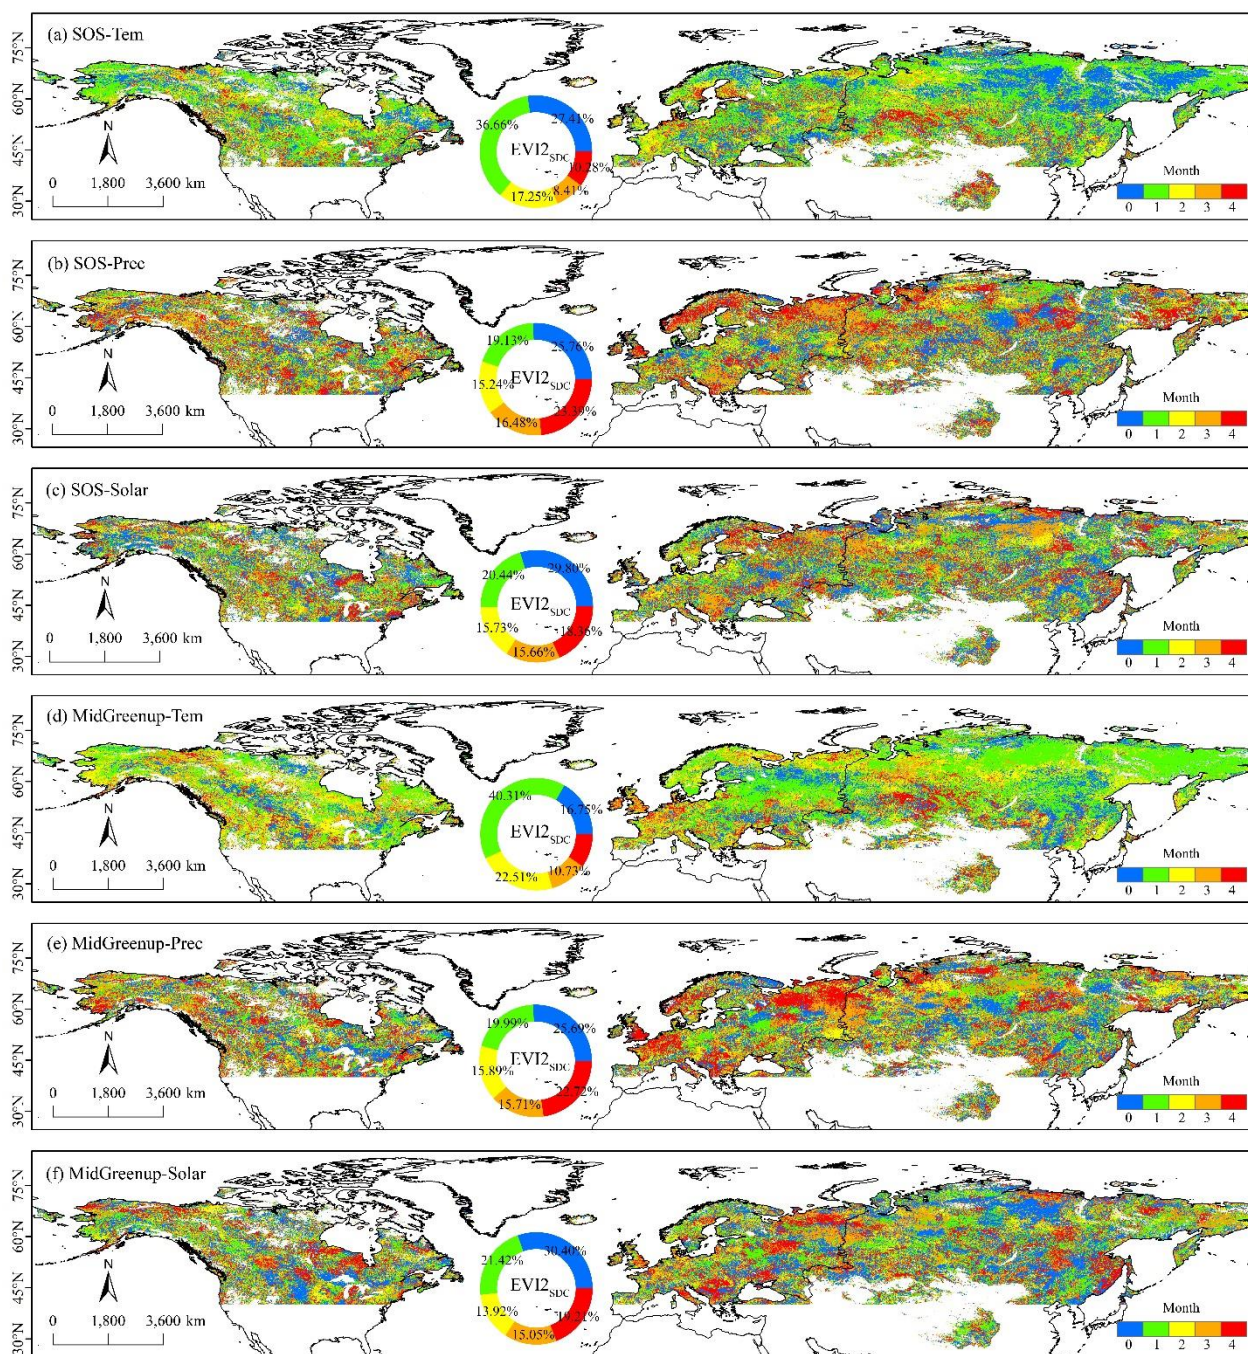

**Figure S14:** The spatial distribution of preseason length for SOS and MidGreenup based on the EVI2SDC dataset.

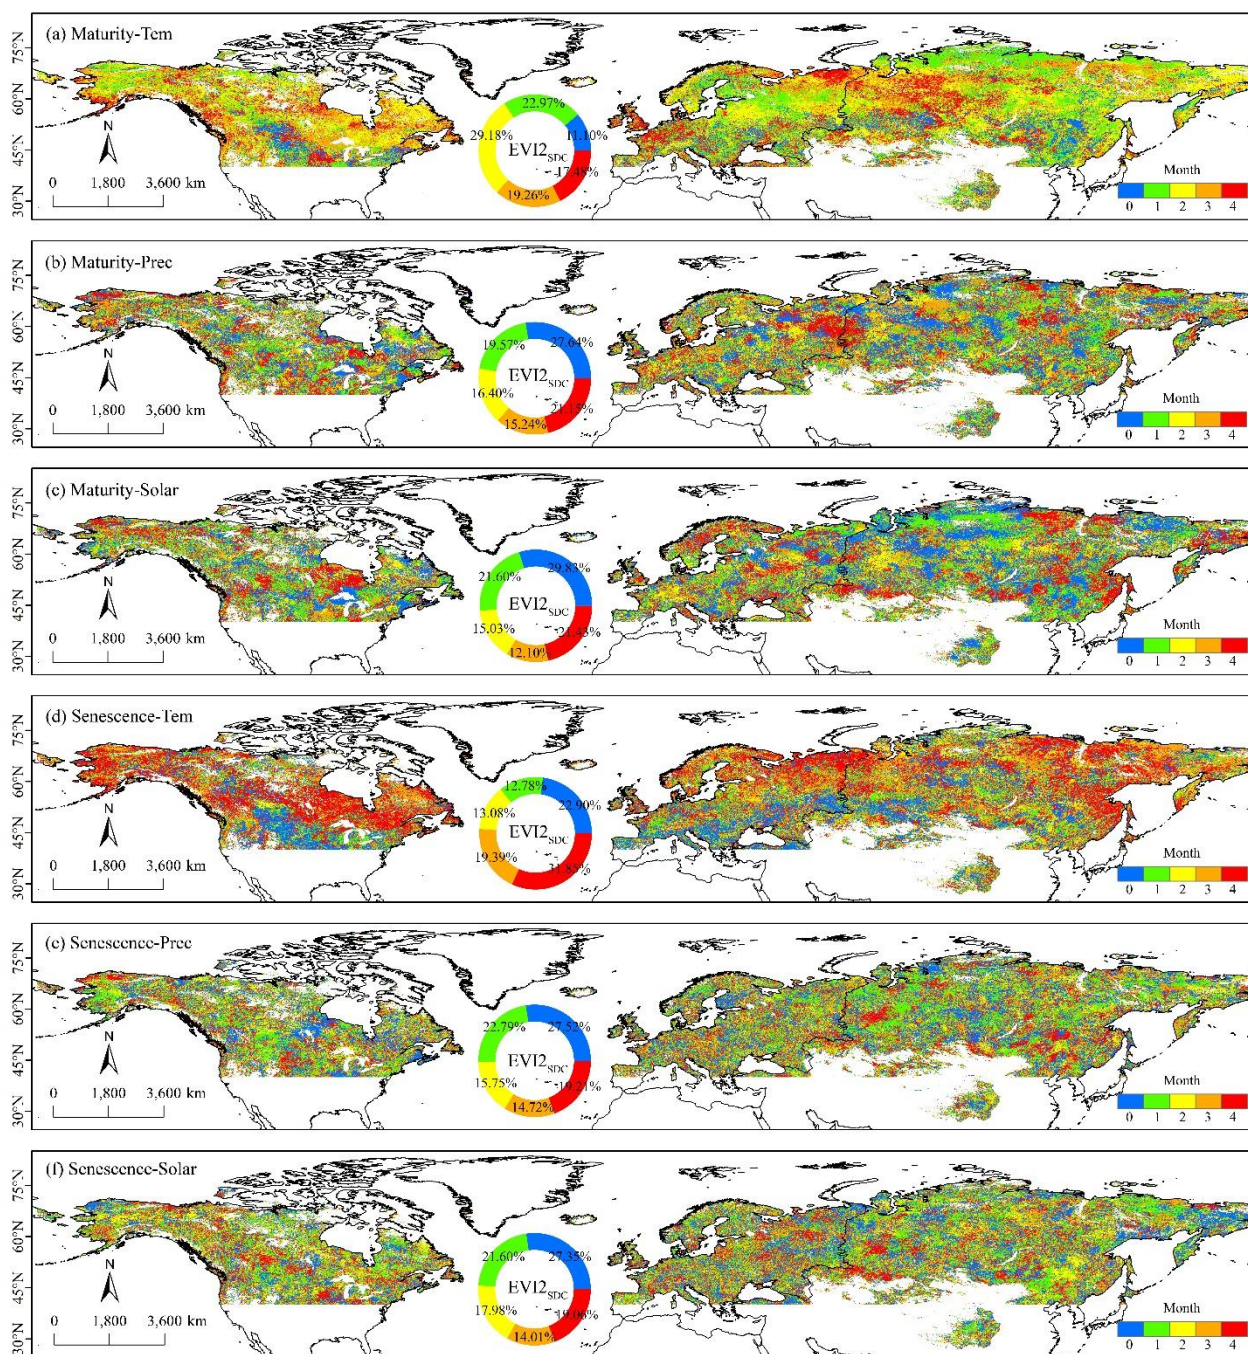

**Figure S15:** The spatial distribution of pre-season length for Maturity and Senescence based on the EVI2SDC dataset.

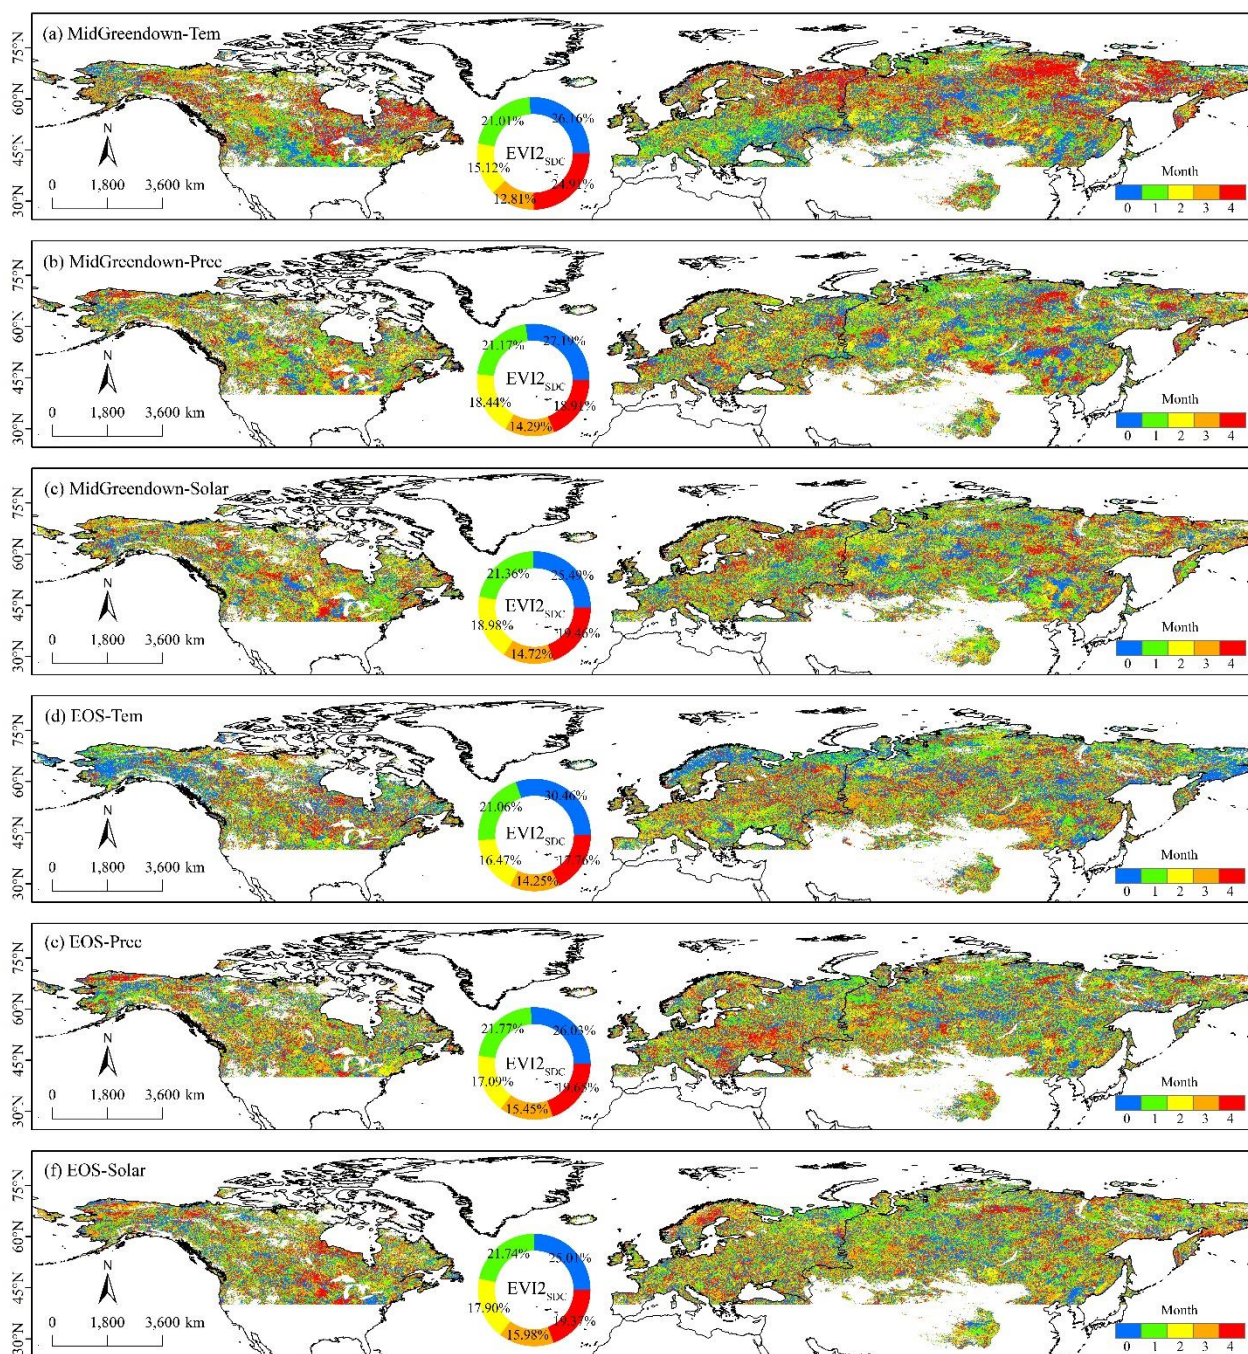

**Figure S16:** The spatial distribution of pre-season length for MidGreenupdown and EOS based on the EVI2SDC dataset.

Table S5: Phenology and trends under different human footprints and vegetation types.

| Vegetation type | Phenology               | Unit:(d)&(d·year <sup>-1</sup> ) |                           |                           |                           |                           |
|-----------------|-------------------------|----------------------------------|---------------------------|---------------------------|---------------------------|---------------------------|
|                 |                         | HFP(0-10)<br>(NDVI/EVI2)         | HFP(10-20)<br>(NDVI/EVI2) | HFP(20-30)<br>(NDVI/EVI2) | HFP(30-40)<br>(NDVI/EVI2) | HFP(40-50)<br>(NDVI/EVI2) |
| Forest          | SOS&trends              | 108.69&0.32**/116.9              | 98.37&-0.06               | 94.42&0.10/               | 93.85&0.06/               | 93.60&0.14/               |
|                 |                         | 0&-0.29***                       | /106.49&-0.07             | 100.36&-0.03              | 98.75&-0.06               | 96.63&-0.01               |
| Forest          | MidGreenup<br>&trends   | 132.74&-0.18                     | 122.50&0.004              | 118.75&0.07/              | 117.62&0.04               | 116.83&0.07               |
|                 |                         | */143.94&-0.15*                  | /131.25&-0.01             | 125.69&-0.01              | /123.39&-0.03             | /120.74&-0.02             |
| Forest          | Maturity<br>&trends     | 166.53&-0.17                     | 155.29&-0.06              | 151.61&0.01               | 149.61&-0.03              | 148.23&-0.03              |
|                 |                         | */170.53&-0.17*                  | /158.38&-0.08             | /153.38&-0.07             | /151.33&-0.09             | /148.88&-0.10             |
| Forest          | Senescence<br>&trends   | 241.60&0.001                     | 234.14&-0.14              | 228.20&-0.33*/21          | 225.68&-0.32*/20          | 221.64&-0.34              |
|                 |                         | /221.68&-0.09                    | /214.06&-0.05             | 0.05&-0.11                | 8.65&-0.13                | ./206.55&-0.15            |
| Forest          | Midgreendown<br>&trends | 289.66&0.13                      | 289.04&-0.23*/269.1       | 285.86&-0.46              | 284.56&-0.50**/27         | 282.19&-0.46              |
|                 |                         | /263.94&0.02                     | 9&-0.06                   | **/269.78&-0.14           | 0.00&-0.17                | */270.02&-0.16            |
| Forest          | EOS&trends              | 314.06&0.08                      | 316.66&-0.24**/302.3      | 314.88&-0.49***/3         | 314.15&-0.53***/3         | 312.27&-0.51              |
|                 |                         | /294.10&0.14**                   | 73&-0.04                  | 04.87&-0.11               | 05.15&-0.10               | **/306.09&-0.09           |
| Forest          | LOS&trends              | 205.37&0.39**/177.2              | 218.28&-0.18              | 220.46&-0.59**/20         | 220.30&-0.59**/20         | 218.67&-0.64              |
|                 |                         | 0&0.43***                        | /196.24&0.03              | 4.51&-0.08                | 6.41&-0.04                | **/209.45&-0.09           |
| Grassland       | SOS&trends              | 135.41&-0.06                     | 106.08&-0.03              | 95.13&0.08/               | 94.10&0.07/               | 94.10&0.07/               |
|                 |                         | /135.27&-0.05                    | /110.02&-0.04             | 97.98&-0.04               | 96.08&-0.10               | 96.08&-0.10               |
| Grassland       | MidGreenup<br>&trends   | 151.61&-0.07                     | 129.60&0.007              | 118.97&0.10/              | 118.72&0.06/              | 118.72&0.06/              |
|                 |                         | /153.33&-0.68                    | /133.76&-0.02             | 122.41&-0.01              | 121.10&-0.04              | 121.06&-0.04              |
| Grassland       | Maturity<br>&trends     | 179.17&-0.13**/178.              | 161.23&-0.02              | 152.88&0.03/              | 154.29&-0.07              | 154.29&-0.07              |
|                 |                         | 83&-0.13**                       | /162.53&-0.05             | 152.41&-0.07              | /152.03&-0.13             | /152.03&-0.13             |
| Grassland       | Senescence<br>&trends   | 231.44&-0.05                     | 213.23&-0.02              | 214.43&-0.15              | 219.22&-0.28*/20          | 219.22&-0.28              |
|                 |                         | /222.55&-0.07                    | /206.34&-0.03             | /203.36&-0.12             | 5.85&-0.23*               | */205.85&-0.23*           |
| Grassland       | Midgreendown<br>&trends | 267.33&0.08                      | 260.48&-0.07              | 269.19&-0.48              | 274.27&-0.47              | 274.27&-0.47*             |
|                 |                         | /255.88&-0.001                   | /251.38&-0.02             | **/259.15&-0.23           | */263.02&-0.26            | /263.02&-0.26             |
| Grassland       | EOS&trends              | 289.71&0.07/282.30               | 297.00&-0.19              | 303.85&-0.53              | 307.29&-0.51              | 307.29&-0.51              |
|                 |                         | &0.05                            | /290.60&-0.06             | **/299.84&-0.19           | **/302.83&-0.16           | **/302.83&-0.16           |
| Grassland       | LOS&trends              | 154.29&0.13./147.03              | 190.92&-0.15              | 208.73&-0.61              | 213.19&-0.58              | 213.19&-0.58              |
|                 |                         | &0.10                            | /180.59&-0.02             | */201.86&-0.15            | */206.75&-0.01            | */206.75&-0.07            |
| Shrub           | SOS&trends              | 155.44&-0.27***/15               | 146.28&-0.29./149.8       | 123.71&-0.38              | 95.15&-0.31/              | 97.56&-0.19               |
|                 |                         | 6.28&-0.27**                     | 6&-0.32                   | /127.44&-0.39             | 94.58&-0.59               | /109.59&-0.48             |
| Shrub           | MidGreenup<br>&trends   | 167.37&-0.27***/16               | 159.20&-0.28./163.9       | 139.63&-0.33              | 116.42&-0.45              | 115.39&-0.01/             |
|                 |                         | 8.99&-0.27***                    | 0&-0.32                   | /145.31&-0.34             | /117.48&-0.73             | 127.87&-0.37              |
| Shrub           | Maturity<br>&trends     | 187.29&-0.30***/18               | 180.83&-0.28./185.6       | 162.97&-0.35              | 145.01&-0.46              | 139.20&-0.27              |
|                 |                         | 9.00&-0.28***                    | 6&-0.30                   | /168.42&-0.35             | /144.97&-1.07             | /151.30&-0.53             |
| Shrub           | Senescence<br>&trends   | 231.19&-0.11*                    | 226.67&-0.07              | 204.14&-0.26              | 180.59&-0.53              | 186.88&-0.10              |
|                 |                         | /226.90&-0.14*                   | /225.27&-0.16             | /206.20&-0.24             | /181.19&-1.14             | /193.21&-0.46             |
| Shrub           | Midgreendown<br>&trends | 261.55&0.16*/253.40              | 260.76&0.24/              | 238.35&-0.01              | 210.25&-0.58              | 227.35&-0.87              |
|                 |                         | &0.01                            | 254.78&0.001              | /240.20&-0.16             | /218.09&-0.94             | /243.06&-0.61             |
| Shrub           | EOS&trends              | 277.20&0.25*/271.60              | 277.83&0.33./             | 259.17&0.03               | 235.00&-0.44              | 256.08&-0.63              |
|                 |                         | &0.17                            | 275.50&0.23               | /270.12&-0.02             | /258.94&-0.54             | /285.72&-0.19             |

|          |                         |                     |                     |                   |                   |                 |
|----------|-------------------------|---------------------|---------------------|-------------------|-------------------|-----------------|
| Shrub    | LOS&trends              | 121.76&0.52***      | 115.146.28&-0.29    | 125.6135.46&0.40/ | 139.85&-0.13      | 158.53&-0.44    |
|          |                         | 32&0.44**           | 5&0.55**            | 146.41&0.36       | /164.36&0.05      | /176.12&0.29    |
| Cropland | SOS&trends              | 117.70&-0.15        | 112.30&0.04/        | 99.72&0.12/       | 92.64&0.1/        | 92.37&0.01/93.8 |
|          |                         | /124.87&-0.10       | 119.81&0.10         | 103.88&0.04       | 93.48&-0.07       | 2&-0.12         |
| Cropland | MidGreenup<br>&trends   | 139.46&-0.05/       | 136.76&0.09/        | 125.16&0.09/      | 119.20&0.05/      | 119.49&-0.02/   |
|          |                         | 145.46&-0.04        | 142.51&0.10         | 128.72&0.03       | 120.47&-0.05      | 120.86&-0.13    |
| Cropland | Maturity<br>&trends     | 167.62&-0.03/       | 166.67&-0.01/       | 158.93&-0.02      | 156.67&-0.07      | 157.86&-0.08/   |
|          |                         | 171.42&-0.07        | 170.09&-0.02        | /160.04&-0.03     | /155.90&-0.09     | 157.04&-0.12    |
| Cropland | Senescence<br>&trends   | 213.97&-0.05/       | 212.38&-0.08/       | 207.86&-0.21**/20 | 205.97&-0.31**/20 | 207.66&-0.32**/ |
|          |                         | 209.12&-0.10        | 208.62&-0.08        | 3.52&-0.13        | 1.71&-0.19        | 203.29&-0.21*   |
| Cropland | Midgreendown<br>&trends | 258.97&-0.15/       | 254.53&-0.38**/244. | 250.90&-0.60***/2 | 247.28&-0.76***/2 | 250.50&-0.78**/ |
|          |                         | 246.26&-0.10        | 78&-0.20*           | 45.35&-0.30 *     | 44.92&-0.40*      | 247.31&-0.38    |
| Cropland | EOS&trends              | 298.22&-0.27*/285.4 | 293.03&-0.55        | 287.24&-0.92***/2 | 282.98&-1.20***/2 | 287.36&-1.21*** |
|          |                         | 5&-0.16             | /283.65&-0.36**     | 85.80&-0.48       | 87.06&-0.51*      | /290.58&-0.52** |
| Cropland | LOS&trends              | 180.52&-0.12/       | 180.73&-0.60**/163. | 187.51&-1.04***/1 | 190.34&-1.30**/19 | 194.99&-1.23**/ |
|          |                         | 160.58&-0.10        | 84&-0.44**          | 81.91&-0.53*      | 3.58&-0.45        | 196.76&-0.40    |

\*Note: The symbol \* indicates significance, and the symbols \*, \*\*, and \*\*\* represent significance levels at the 95% (P<0.05), 99% (P<0.01), and 99.9% (P<0.001) levels, respectively.

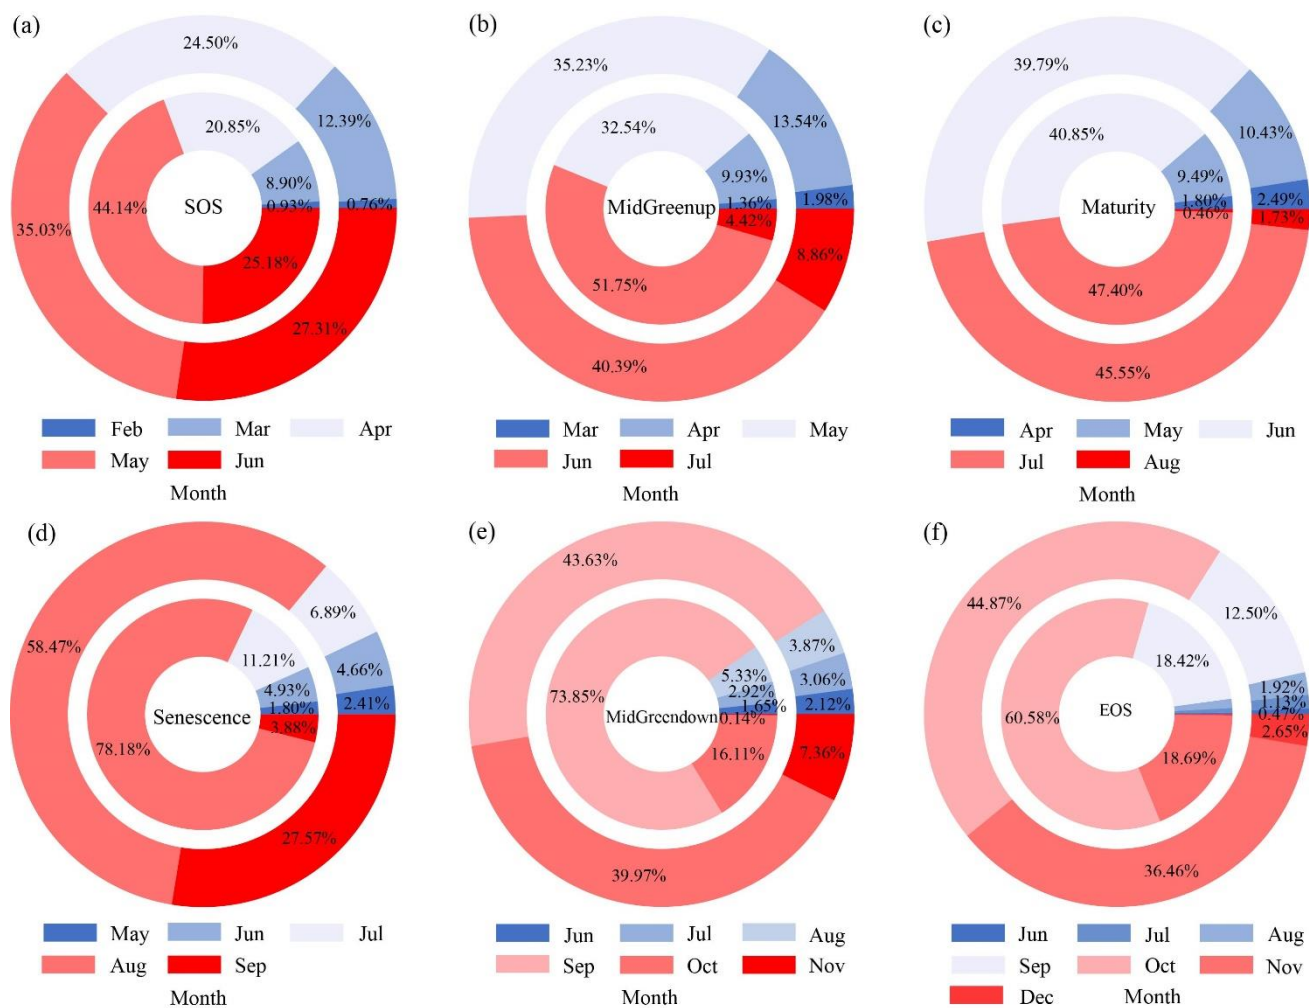

**Figure S17:** Monthly pixel percentage statistics of phenological parameters retrieved by NDVI<sub>SDC</sub> and EVI2<sub>SDC</sub>. The outer circle represents the pixel percentage statistics of each phenological parameter per month for NDVI<sub>SDC</sub>, while the inner circle represents the pixel percentage statistics of each phenological parameter per month for EVI2<sub>SDC</sub>. (a), (b), (c), (d), (e), (f) sequentially display the phenological parameters SOS, MidGreenup, Maturity, Senescence, MidGreendown, and EOS.

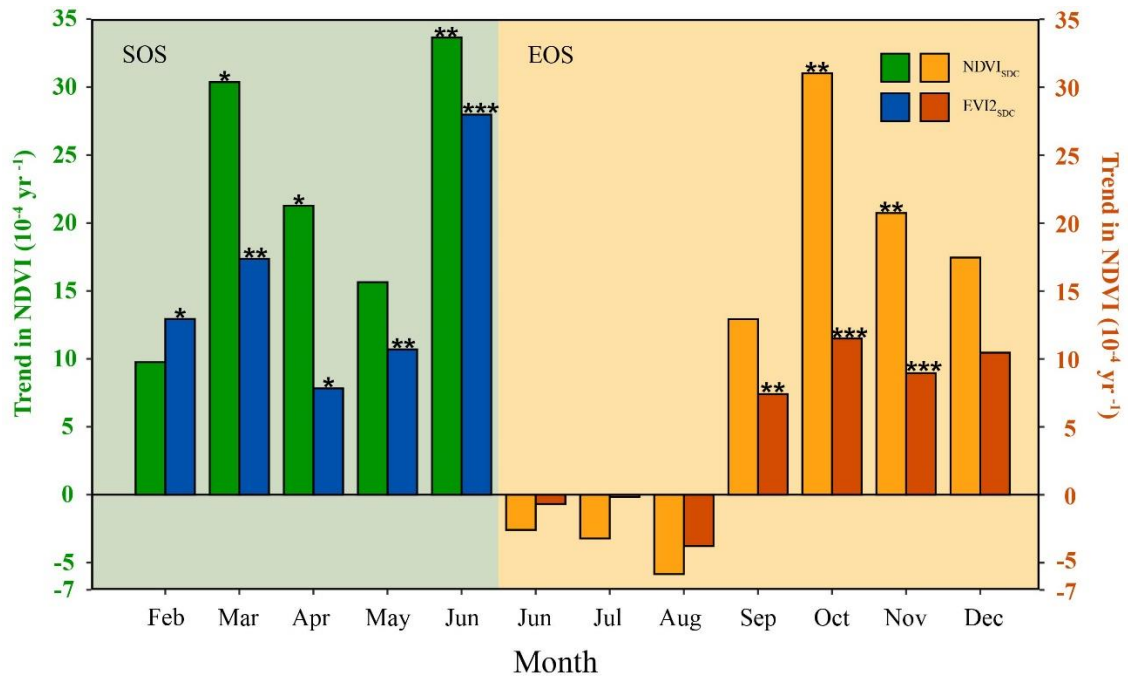

**Figure S18:** Monthly trends in  $SDC_{NDVI}$  and  $SDC_{EVI2}$  for SOS and EOS. Symbols \*, \*\*, and \*\*\* represent the significance levels at 95 % ( $p < 0.05$ ), 99 % ( $p < 0.01$ ), and 99.9 % ( $p < 0.001$ ), respectively.

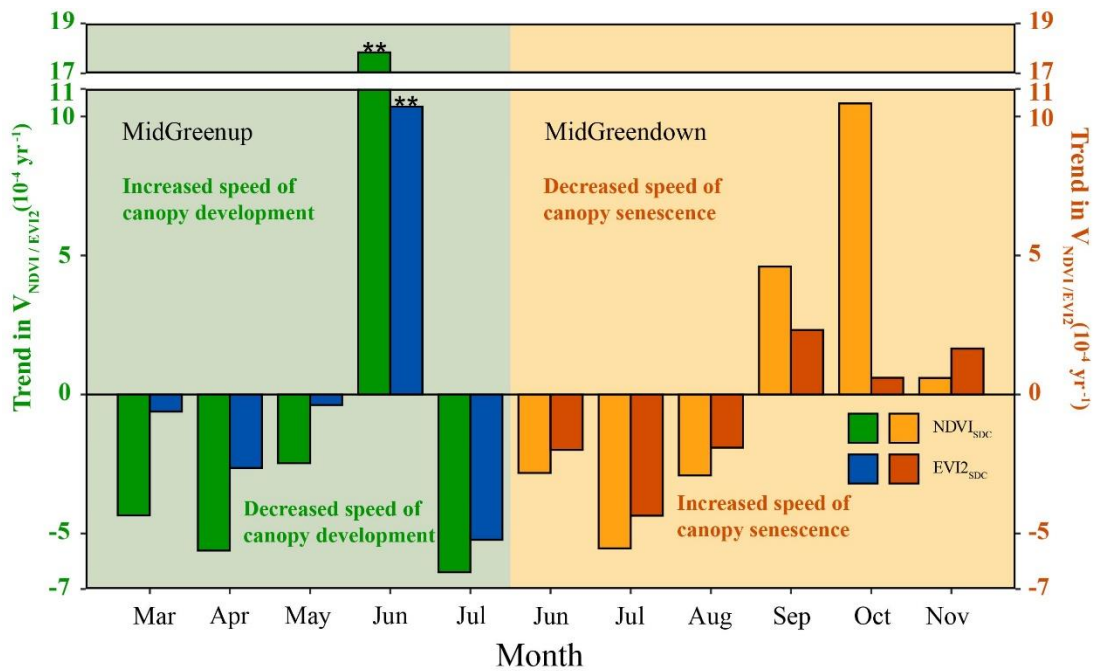

**Figure S19:** Monthly trends in  $V_{NDVI/EVI2}$  for MidGreenup and MidGreendown. Symbols \*, \*\*, and \*\*\* represent the significance levels at 95 % ( $p < 0.05$ ), 99 % ( $p < 0.01$ ), and 99.9 % ( $p < 0.001$ ), respectively.

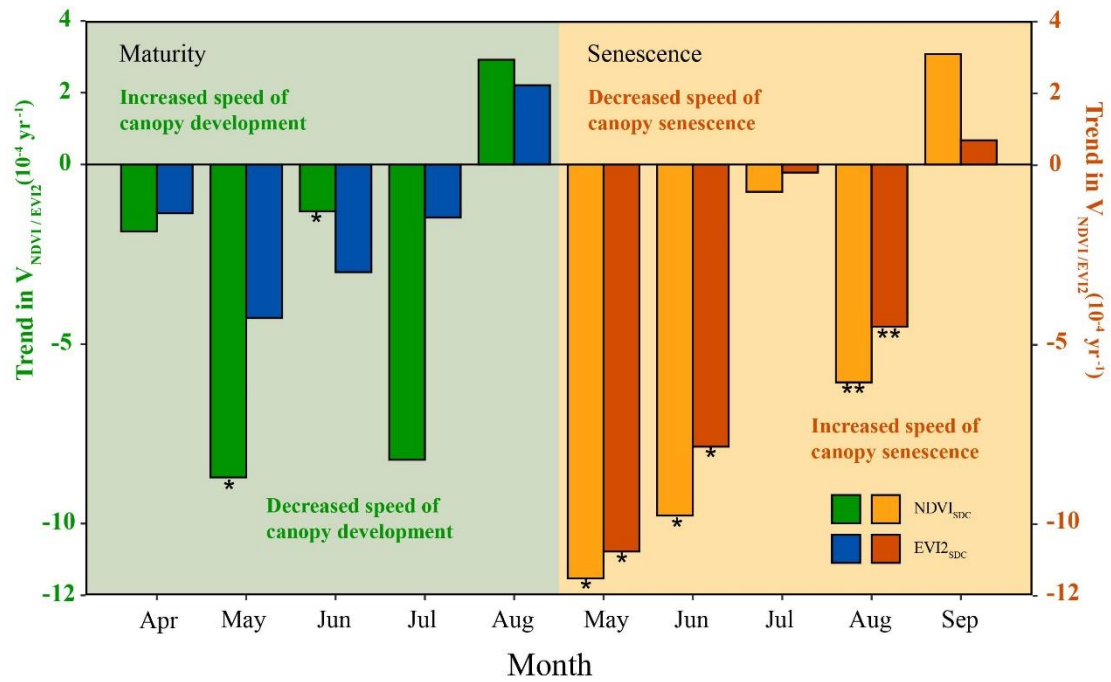

**Figure S20:** Monthly trends in  $V_{NDVI/EVI2}$  for Maturity and Senescence. Symbols \*, \*\*, and \*\*\* represent the significance levels at 95 % ( $p < 0.05$ ), 99 % ( $p < 0.01$ ), and 99.9 % ( $p < 0.001$ ), respectively.

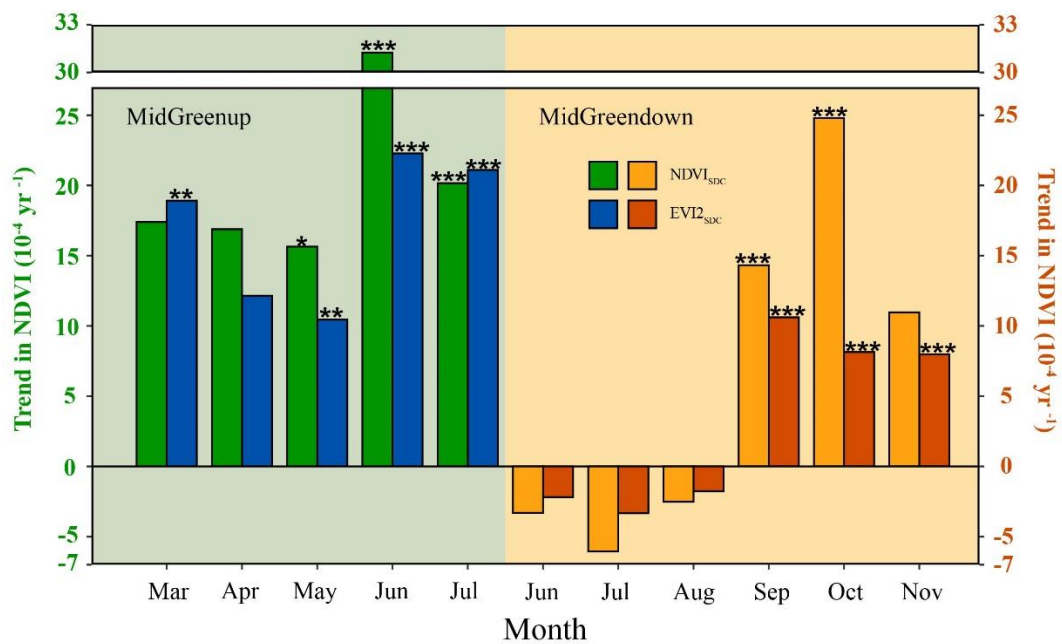

**Figure S21:** Monthly trends in  $NDVI_{SDC}$  and  $EVI2_{SDC}$  for MidGreenup and MidGreendown. Symbols \*, \*\*, and \*\*\* represent the significance levels at 95 % ( $p < 0.05$ ), 99 % ( $p < 0.01$ ), and 99.9 % ( $p < 0.001$ ), respectively.

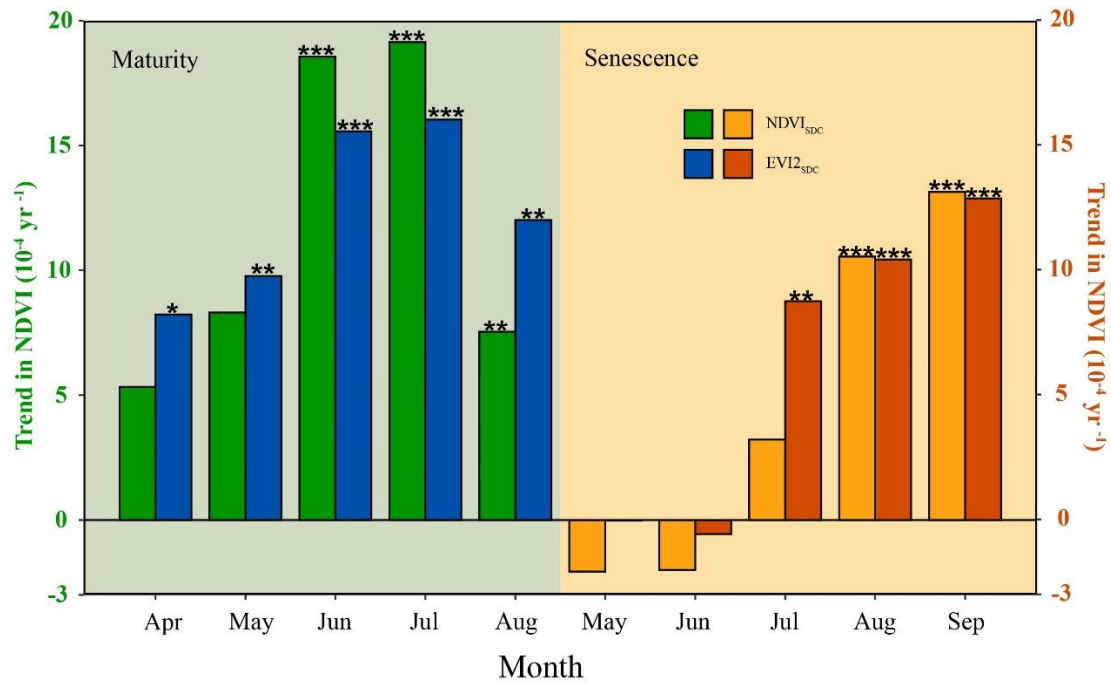

**Figure S22:** Monthly trends in NDVI<sub>SDC</sub> and EVI2<sub>SDC</sub> for Maturity and Senescence. Symbols \*, \*\*, and \*\*\* represent the significance levels at 95 % ( $p < 0.05$ ), 99 % ( $p < 0.01$ ), and 99.9 % ( $p < 0.001$ ), respectively.

Table S6: Contribution rates of vegetation greening rate in different vegetation types for China and India.

| Country | Vegetation type | Positive contribution (NDVI <sub>SDC</sub> /EVI2 <sub>SDC</sub> ,unit:%) |
|---------|-----------------|--------------------------------------------------------------------------|
| India   | Forest          | 5.77/5.87                                                                |
|         | Shrub           | 4.5/4.78                                                                 |
|         | Grassland       | 20.37/20.45                                                              |
|         | Cropland        | 69.30/68.90                                                              |
| China   | Forest          | 9.94/11.63                                                               |
|         | Shrub           | 0.64/0.52                                                                |
|         | Grassland       | 66.31/64.42                                                              |
|         | Cropland        | 22.11/23.43                                                              |

Table S7: Russia 's land use transfer matrix from 2001 to 2022(×10<sup>4</sup> km<sup>2</sup>)

| 2001<br>2022 | Grassland | Forest | Shrub  | Cropland | Built-up | Other lands | Water  | Total   |
|--------------|-----------|--------|--------|----------|----------|-------------|--------|---------|
| Grassland    | 749.4     | 54.1   | 64.7   | 15.5     | 0.17     | 5.4         | 36.8   | 926.07  |
| Forest       | 53.3      | 359.9  | 0.2    | 3.5      | 0.02     | ----        | 2.5    | 419.42  |
| Shrub        | 36.8      | 0.9    | 421.9  | ---      | ---      | 0.2         | 13.9   | 473.70  |
| Cropland     | 8.0       | 0.4    | ----   | 117.0    | 0.04     | ---         | 0.04   | 125.48  |
| Built-up     | 0.1       | 0.02   | ---    | 0.06     | 2.3      | 0.0011      | 0.0038 | 2.48    |
| Other lands  | 1.7       | ---    | 0.0078 | ---      | ----     | 31.4        | 0.2    | 33.30   |
| Water        | 1.2       | 0.4    | 0.09   | 0.02     | ---      | 0.3         | 84.1   | 86.11   |
| Total        | 850.5     | 415.72 | 486.90 | 136.08   | 2.53     | 37.30       | 136.54 | 2065.57 |

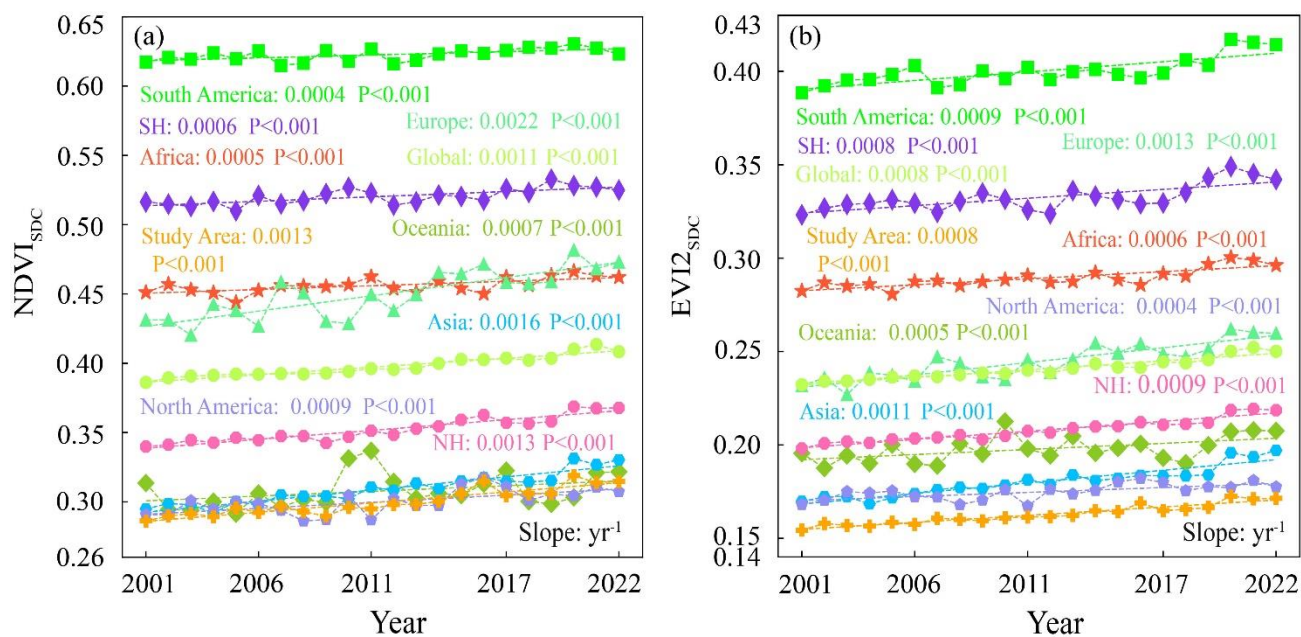

**Figure S23:** The interannual variations of NDVI<sub>SDC</sub> and EVI2<sub>SDC</sub> for different continents from 2001 to 2022. SH represents the Southern Hemisphere, and NH represents the Northern Hemisphere.

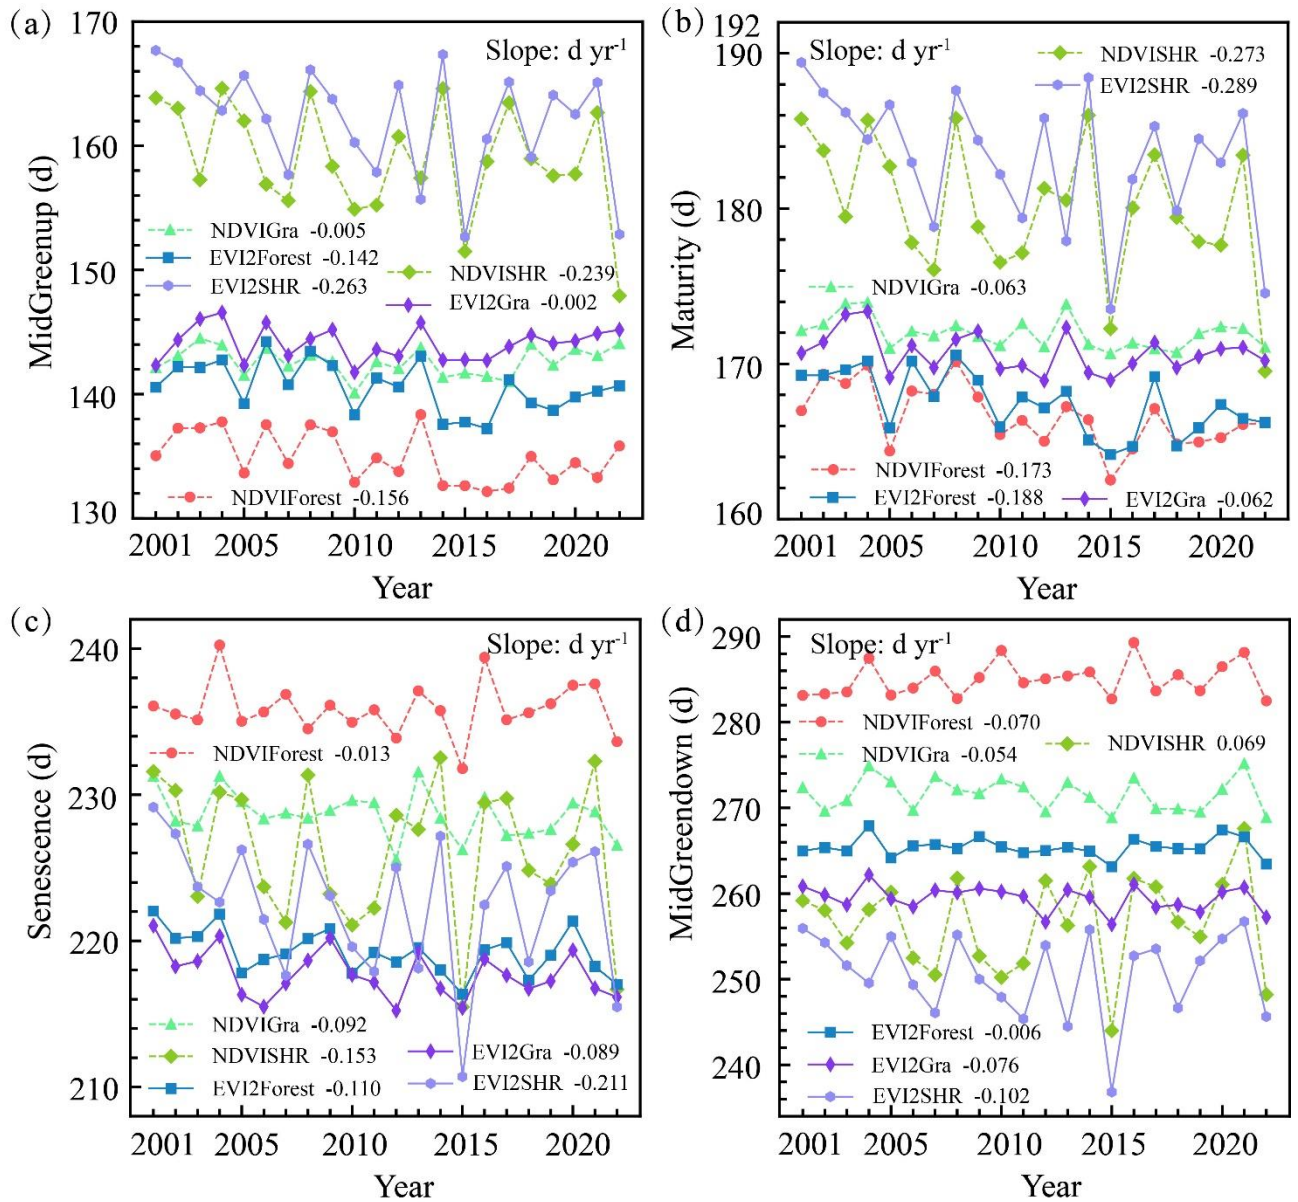

**Figure S24:** Interannual phenological changes in forest, shrub, and grassland from 2001 to 2022. (a), (b), (c), and (d) represent the interannual phenological changes of MidGreenup, Maturity, Senescence, and MidGreendown for forest, shrub, and grassland, respectively. "Gra" represents grassland, and "SHR" represents shrub.
